# Supplementary material for: Altruism in the time of COVID-19: We are all in this together, but who is we?
Source: Research Square preprint supplement (doi:10.21203/rs.3.rs-139076/v1), 2021-01-05
Supplement: Supplementary file 1 [file f68832655d1eed1b232f8ac8.pdf]

2                                **Supplementary Information**

3                                \*Gianluca Grimalda  
4                                Kiel Institute for the World Economy  
5                                Kiellinie 66  
6                                24105 Kiel (Germany)  
7                                ORCID: 0000-0002-5605-5591

8                                Nancy R. Buchan  
9                                Sonoco Department of International Business  
10                                University of South Carolina  
11                                1014 College Street  
12                                Columbia, SC 29205  
13                                ORCID: 0000-0002-7611-7227

14                                Orgul D. Ozturk  
15                                Department of Economics  
16                                University of South Carolina  
17                                1014 College Street  
18                                Columbia, SC 29205  
19                                ORCID: 0000-0001-8446-0271

20                                Adriana C. Pinate  
21                                Social Sciences, Gran Sasso Science Institute (GSSI)  
22                                67100 L'Aquila, Italy  
23                                ORCID: 0000-0002-2262-8371

24                                Giulia Urso  
25                                Social Sciences, Gran Sasso Science Institute (GSSI)  
26                                67100 L'Aquila, Italy  
27                                ORCID: 0000-0003-0696-0363

28                                Marilynn B. Brewer, Professor Emeritus  
29                                Department of Psychology  
30                                Ohio State University  
31                                1835 Neil Avenue  
32                                Columbus, OH 43210  
33                                ORCID: 0000-0003-3360-003X  
34

35 **Supplementary Material**

| United States               |                   |          |      |     | Italy             |          |      |     | Question from which variable is based and notes on variable construction                                                                                                                                                                        |
|-----------------------------|-------------------|----------|------|-----|-------------------|----------|------|-----|-------------------------------------------------------------------------------------------------------------------------------------------------------------------------------------------------------------------------------------------------|
| Measure                     | Mean / Proportion | Std.Dev. | Min  | Max | Mean / Proportion | Std.Dev. | Min  | Max |                                                                                                                                                                                                                                                 |
| Share of Bonus Donated      | 0.55              | 0.31     | 0.04 | 1   | 0.63              | 0.28     | 0.03 | 1   |                                                                                                                                                                                                                                                 |
| Charity Choice              |                   |          |      |     |                   |          |      |     | Question (Q)16                                                                                                                                                                                                                                  |
| Self                        | 36.70%            |          |      |     | 23.10%            |          |      |     |                                                                                                                                                                                                                                                 |
| State/Region                | 40.99%            |          |      |     | 32.92%            |          |      |     |                                                                                                                                                                                                                                                 |
| National                    | 12.98%            |          |      |     | 26.56%            |          |      |     |                                                                                                                                                                                                                                                 |
| International               | 9.33%             |          |      |     | 17.43%            |          |      |     |                                                                                                                                                                                                                                                 |
| Conditional Donation Amount |                   |          |      |     |                   |          |      |     | Q17                                                                                                                                                                                                                                             |
| State/Region                | 0.53              | 0.30     | 0.04 | 1   | 0.56              | 0.28     | 0.03 | 1   |                                                                                                                                                                                                                                                 |
| National                    | 0.58              | 0.32     | 0.1  | 1   | 0.62              | 0.27     | 0.03 | 1   |                                                                                                                                                                                                                                                 |
| International               | 0.62              | 0.31     | 0.2  | 1   | 0.76              | 0.28     | 0.13 | 1   |                                                                                                                                                                                                                                                 |
| Aggregate Donation          |                   |          |      |     |                   |          |      |     |                                                                                                                                                                                                                                                 |
| State/Region                | 0.22              | 0.32     | 0    | 1   | 0.19              | 0.31     | 0    | 1   |                                                                                                                                                                                                                                                 |
| National                    | 0.08              | 0.23     | 0    | 1   | 0.16              | 0.31     | 0    | 1   |                                                                                                                                                                                                                                                 |
| International               | 0.06              | 0.20     | 0    | 1   | 0.13              | 0.31     | 0    | 1   |                                                                                                                                                                                                                                                 |
| Age                         |                   |          |      |     |                   |          |      |     | Q3                                                                                                                                                                                                                                              |
|                             | 36.3              | 12.85    | 18   | 77  | 32.10             | 10.48    | 18   | 66  | Variable expressed in years.                                                                                                                                                                                                                    |
| Female                      |                   |          |      |     |                   |          |      |     | Q2                                                                                                                                                                                                                                              |
|                             | 50.2%             |          | 0    | 1   | 49.7%             |          | 0    | 1   | Dummy variable equal to 1 if the respondent is a female and 0 otherwise. Three respondents classified themselves as belonging to the “Other” category, and they have been grouped with males.                                                   |
| Education Level             |                   |          |      |     |                   |          |      |     | Q9                                                                                                                                                                                                                                              |
| Low                         | 10.1%             |          |      |     | 4.4%              |          |      |     | Categorical variable indicating the level of education of the respondent:<br>Low= High school or less;<br>Medium= Some College or Technical School or Diploma;<br>High= College or more.<br>We used a five-level scale in econometric analysis. |
| Medium                      | 26.2%             |          |      |     | 70.0%             |          |      |     |                                                                                                                                                                                                                                                 |
| High                        | 63.7%             |          |      |     | 25.6%             |          |      |     |                                                                                                                                                                                                                                                 |
|                             |                   |          |      |     |                   |          |      |     |                                                                                                                                                                                                                                                 |

| <i>(Continued)</i>          |                   | United States |     |     |  | Italy             |          |     |     |                                                                                                                                                                                                                                                                                                                                                                                                   |
|-----------------------------|-------------------|---------------|-----|-----|--|-------------------|----------|-----|-----|---------------------------------------------------------------------------------------------------------------------------------------------------------------------------------------------------------------------------------------------------------------------------------------------------------------------------------------------------------------------------------------------------|
|                             | Mean / Proportion | Std.Dev.      | Min | Max |  | Mean / Proportion | Std.Dev. | Min | Max |                                                                                                                                                                                                                                                                                                                                                                                                   |
| <b>Place of Residence</b>   |                   |               |     |     |  |                   |          |     |     | <b>Q11</b>                                                                                                                                                                                                                                                                                                                                                                                        |
| Rural/Village/Town          | 21.2%             |               |     |     |  | 41.9%             |          |     |     | Dummy variables indicating the place of residence of the respondent:<br>Rural/Village/Town= less than 50,000 inhabitants;<br>Small/Medium Metro Area= 50,000 - 1.5 million inhabitants;<br>Large Metropolitan Area= larger than 1.5 million inhabitants.                                                                                                                                          |
| Small/Medium Metro Area     | 58.3%             |               |     |     |  | 41.2%             |          |     |     |                                                                                                                                                                                                                                                                                                                                                                                                   |
| Large Metropolitan Area     | 20.5%             |               |     |     |  | 16.9%             |          |     |     |                                                                                                                                                                                                                                                                                                                                                                                                   |
| <b>Rooted</b>               |                   |               |     |     |  |                   |          |     |     | <b>Q4   Q6   Q7</b>                                                                                                                                                                                                                                                                                                                                                                               |
|                             | 0.74              | 0.44          | 0   | 1   |  | 0.89              | 0.32     | 0   | 1   | Dummy variable assuming value 1 if the respondent, her mother and her father were all born in the country <U.S. or Italy> and 0 otherwise.                                                                                                                                                                                                                                                        |
| <b>Geographical Regions</b> |                   |               |     |     |  |                   |          |     |     | <b>Q12</b>                                                                                                                                                                                                                                                                                                                                                                                        |
| Northeast                   | 23.6%             |               |     |     |  |                   |          |     |     | Dummy variables indicating the geographical regions where the participant resides.                                                                                                                                                                                                                                                                                                                |
| Midwest                     | 26.6%             |               |     |     |  |                   |          |     |     |                                                                                                                                                                                                                                                                                                                                                                                                   |
| South                       | 24.9%             |               |     |     |  |                   |          |     |     |                                                                                                                                                                                                                                                                                                                                                                                                   |
| West                        | 24.9%             |               |     |     |  |                   |          |     |     |                                                                                                                                                                                                                                                                                                                                                                                                   |
| South Italy                 |                   |               |     |     |  | 49.9%             |          |     |     |                                                                                                                                                                                                                                                                                                                                                                                                   |
| <b>Conservative scale</b>   |                   |               |     |     |  |                   |          |     |     | <b>Q64</b>                                                                                                                                                                                                                                                                                                                                                                                        |
| Liberal                     | 51.8%             |               |     |     |  | 56.2%             |          |     |     | Categorical variable indicating participants' political orientation:<br>In this Table we report the percentage of participants who classified themselves as: "Liberal" or "Very Liberal" (labelled Liberal), "Neither Liberal nor Conservative" (labelled Centrist), or "Conservative" or "Very Conservative" (labelled Conservatives).<br>We used the 5-level scale in the econometric analysis. |
| Centrist                    | 19.4%             |               |     |     |  | 30.7%             |          |     |     |                                                                                                                                                                                                                                                                                                                                                                                                   |
| Conservative                | 28.8%             |               |     |     |  | 13.1%             |          |     |     |                                                                                                                                                                                                                                                                                                                                                                                                   |
| <b>Income</b>               |                   |               |     |     |  |                   |          |     |     | <b>Q68</b>                                                                                                                                                                                                                                                                                                                                                                                        |
| Low                         | 12.0%             |               |     |     |  | 42.9%             |          |     |     | Categorical variable indicating the 2019 household income bracket levels ranging from (1) \$0-9,999/€0 - €5,999 to (10) Over \$200,000/Over €100,000. The 10-level scale was used in econometric analysis. In this Table we report the percentage of people falling in:<br>Brackets 1-3 (Labelled Low);<br>Brackets 4-7 (Labelled Middle);<br>Brackets 8-10 (Labelled High).                      |
| Middle                      | 62.5%             |               |     |     |  | 50.9%             |          |     |     |                                                                                                                                                                                                                                                                                                                                                                                                   |
| High                        | 25.5%             |               |     |     |  | 6.2%              |          |     |     |                                                                                                                                                                                                                                                                                                                                                                                                   |
| <b>Income Loss</b>          |                   |               |     |     |  |                   |          |     |     | <b>Q54</b>                                                                                                                                                                                                                                                                                                                                                                                        |
|                             | 38.1%             |               |     |     |  | 34.3%             |          |     |     | Dummy variable identifying participants who declared to have lost income because of COVID-19.                                                                                                                                                                                                                                                                                                     |

| <i>(Continued)</i>                       |                      | United States |      |          |                      | Italy    |      |          |                                                                                                                                                                                                                                                                                                                                                                                                                                                               |  |
|------------------------------------------|----------------------|---------------|------|----------|----------------------|----------|------|----------|---------------------------------------------------------------------------------------------------------------------------------------------------------------------------------------------------------------------------------------------------------------------------------------------------------------------------------------------------------------------------------------------------------------------------------------------------------------|--|
|                                          | Mean /<br>Proportion | Std.Dev.      | Min  | Max      | Mean /<br>Proportion | Std.Dev. | Min  | Max      |                                                                                                                                                                                                                                                                                                                                                                                                                                                               |  |
| <b>Priming</b>                           |                      |               |      |          |                      |          |      |          | <b>Q14</b>                                                                                                                                                                                                                                                                                                                                                                                                                                                    |  |
| Baseline                                 | 24.7%                |               |      |          | 24.8%                |          |      |          | Dummy variable indicating the priming condition randomly assigned to the participant.                                                                                                                                                                                                                                                                                                                                                                         |  |
| State/Region                             | 23.7%                |               |      |          | 25.2%                |          |      |          |                                                                                                                                                                                                                                                                                                                                                                                                                                                               |  |
| Country                                  | 24.7%                |               |      |          | 24.6%                |          |      |          |                                                                                                                                                                                                                                                                                                                                                                                                                                                               |  |
| World                                    | 26.9%                |               |      |          | 25.5%                |          |      |          |                                                                                                                                                                                                                                                                                                                                                                                                                                                               |  |
| <b>County-level COVID Exposure</b>       |                      |               |      |          |                      |          |      |          |                                                                                                                                                                                                                                                                                                                                                                                                                                                               |  |
| Cumulative Number of Cases               | 683.86               | 3.11          | 3.11 | 3,893.71 | 373.38               | 306.05   | 28.2 | 1,821.42 | The econometric model included the total number of confirmed cases per million of inhabitants in the participant’s county of residence the day before participation (expressed in logarithm). In this Table we report the values before log transformation.                                                                                                                                                                                                   |  |
| <b>State/Region-level COVID Exposure</b> |                      |               |      |          |                      |          |      |          |                                                                                                                                                                                                                                                                                                                                                                                                                                                               |  |
| Cumulative Number of Deaths              | 37.07                | 57.82         | 0    | 243.47   | 53.52                | 55.04    | 5.04 | 164.02   | The econometric model included the total number of confirmed deaths per million of inhabitants in the participant’s state (for U.S.) or region (for Italy) of residence the day before participation (expressed in logarithm). In this Table we report the values before log transformation.                                                                                                                                                                  |  |
| <b>Personal COVID Exposure</b>           |                      |               |      |          |                      |          |      |          | <b>Q18a-b   Q19a-b   Q20a-b   Q22</b>                                                                                                                                                                                                                                                                                                                                                                                                                         |  |
| Diagnosed Self                           | 0.4%                 |               |      |          | 0.6%                 |          |      |          | The econometric model included a Dummy variable identifying participants who had been infected, or whose family members or acquaintances had been infected, or whose family members or acquaintances had died of COVID-19. This Table reports the percentage of participants who had been infected (labelled “Diagnosed Self”), whose family members or acquaintances had been infected (labelled “Diagnosed Others”) or had died (Labelled “Others’ Death”). |  |
| Diagnosed Others:                        |                      |               |      |          |                      |          |      |          |                                                                                                                                                                                                                                                                                                                                                                                                                                                               |  |
| Someone you live with                    | 1.7%                 |               |      |          | 2.5%                 |          |      |          |                                                                                                                                                                                                                                                                                                                                                                                                                                                               |  |
| Family member or a close friend          | 16.7%                |               |      |          | 15.4%                |          |      |          |                                                                                                                                                                                                                                                                                                                                                                                                                                                               |  |
| Acquaintances                            | 26.1%                |               |      |          | 38.5%                |          |      |          |                                                                                                                                                                                                                                                                                                                                                                                                                                                               |  |
| Others’ Death                            | 9.4%                 |               |      |          | 16.7%                |          |      |          |                                                                                                                                                                                                                                                                                                                                                                                                                                                               |  |
| <b>Social Identity</b>                   |                      |               |      |          |                      |          |      |          | <b>Q37a-b-c   Q38a-b-c   Q39a-b-c</b>                                                                                                                                                                                                                                                                                                                                                                                                                         |  |
| State/Region                             | 2.39                 | 0.75          | 1    | 4        | 2.64                 | 0.72     | 1    | 4        | Mean of the participant’s score for three items measuring attachment, closeness, and degree to which the participant thinks of herself as a typical member of the state (U.S.)/region (Italy), country or world community. Higher values denote higher social identity.                                                                                                                                                                                       |  |
| National                                 | 2.54                 | 0.76          | 1    | 4        | 2.93                 | 0.72     | 1    | 4        |                                                                                                                                                                                                                                                                                                                                                                                                                                                               |  |
| Global                                   | 2.27                 | 0.79          | 1    | 4        | 3.14                 | 0.72     | 1    | 4        |                                                                                                                                                                                                                                                                                                                                                                                                                                                               |  |

| <i>(Continued)</i>               | United States        |          |     |     | Italy                |          |     |     |                                                                                                                                                                                                                                                                                                                                                                                                                                                                                      |
|----------------------------------|----------------------|----------|-----|-----|----------------------|----------|-----|-----|--------------------------------------------------------------------------------------------------------------------------------------------------------------------------------------------------------------------------------------------------------------------------------------------------------------------------------------------------------------------------------------------------------------------------------------------------------------------------------------|
|                                  | Mean /<br>Proportion | Std.Dev. | Min | Max | Mean /<br>Proportion | Std.Dev. | Min | Max |                                                                                                                                                                                                                                                                                                                                                                                                                                                                                      |
| <b>Trust in People</b>           |                      |          |     |     |                      |          |     |     | <b>Q40   Q41   Q42   Q43</b>                                                                                                                                                                                                                                                                                                                                                                                                                                                         |
| Local Community                  | 3.13                 | 0.90     | 1   | 5   | 2.92                 | 0.89     | 1   | 5   | Categorical variables indicating the respondent's level of trust in people for each dimension: Local (State/Region), National and International (other countries). The variables entered the econometric model with the same levels used in the corresponding questions:<br>1= I don't trust them at all;<br>5= I completely trust them.                                                                                                                                             |
| State/Region                     | 3.04                 | 0.86     | 1   | 5   | 2.96                 | 0.89     | 1   | 5   |                                                                                                                                                                                                                                                                                                                                                                                                                                                                                      |
| Country                          | 2.72                 | 0.88     | 1   | 5   | 2.65                 | 0.87     | 1   | 5   |                                                                                                                                                                                                                                                                                                                                                                                                                                                                                      |
| Other Countries                  | 2.74                 | 0.84     | 1   | 5   | 2.92                 | 0.79     | 1   | 5   |                                                                                                                                                                                                                                                                                                                                                                                                                                                                                      |
| <b>PSYC Vulnerability</b>        |                      |          |     |     |                      |          |     |     | <b>Q23   Q24   Q25</b>                                                                                                                                                                                                                                                                                                                                                                                                                                                               |
|                                  | 0.39                 | 0.38     | 0   | 1   | 0.27                 | 0.33     | 0   | 1   | Dummy variables were constructed to identify respondents who answered that they worried "always" or "most of the time" (a) that they would get infected, or (b) that their community would get infected from COVID19, or (c) that they agreed "strongly" or "somewhat" to being vulnerable to COVID19. An index of Psychological Vulnerability was then created averaging over these three variables. Higher values denote higher psychological vulnerability.                       |
| <b>Social Relationships Loss</b> |                      |          |     |     |                      |          |     |     | <b>Q26b  Q28b   Q32   Q35b</b>                                                                                                                                                                                                                                                                                                                                                                                                                                                       |
|                                  | 0.53                 | 0.26     | 0   | 1   | 0.42                 | 0.21     | 0   | 1   | Dummy variables were constructed to identify respondents answering that they had fewer in-person meetings or meetings with organized groups, and performed fewer volunteering activities, after COVID-19, compared to before COVID-19. An index of Social Relationships Loss was created by averaging across these variables. Higher values denote higher social relationship losses.                                                                                                |
| <b>Occupation</b>                |                      |          |     |     |                      |          |     |     | <b>Q67</b>                                                                                                                                                                                                                                                                                                                                                                                                                                                                           |
| Manual workers                   | 29.8%                |          |     |     | 30.4%                |          |     |     | Categorical variable indicating the occupation of the respondent:<br>Manual Workers= Unskilled Labor, Service and Sale Workers, Plant and Machines Operators, and Assemblers, Skilled Agricultural, Forestry and Fishery Workers;<br>Employees/self-employed= Technicians and Associate Professionals; Armed Forces Occupations; Craft and Related Trades Workers;<br>Professionals;<br>Managers.<br>In the econometric analysis Professionals and Managers groups have been merged. |
| Employees/self-employed          | 24.1%                |          |     |     | 39.5%                |          |     |     |                                                                                                                                                                                                                                                                                                                                                                                                                                                                                      |
| Professionals                    | 33.5%                |          |     |     | 2.0%                 |          |     |     |                                                                                                                                                                                                                                                                                                                                                                                                                                                                                      |
| Managers                         | 12.7%                |          |     |     | 28.1%                |          |     |     |                                                                                                                                                                                                                                                                                                                                                                                                                                                                                      |

| <i>(Continued)</i>                           | United States        |          |     |     | Italy                |          |     |     |                                                                                                                                                                                                                      |
|----------------------------------------------|----------------------|----------|-----|-----|----------------------|----------|-----|-----|----------------------------------------------------------------------------------------------------------------------------------------------------------------------------------------------------------------------|
|                                              | Mean /<br>Proportion | Std.Dev. | Min | Max | Mean /<br>Proportion | Std.Dev. | Min | Max |                                                                                                                                                                                                                      |
| <b>Evaluation of charity characteristics</b> |                      |          |     |     |                      |          |     |     | <b>Q68bis2   Q68bis3   Q68bis4   Q68bis5</b>                                                                                                                                                                         |
| <b>Efficiency</b>                            |                      |          |     |     |                      |          |     |     | Dummy variables identifying participants answering that the most efficient charity in the management of donations operated at state/regional, national, or world level, leaving “No difference” as omitted category. |
| No difference                                |                      |          |     |     | 28.6%                |          |     |     |                                                                                                                                                                                                                      |
| Regional                                     |                      |          |     |     | 45.0%                |          |     |     |                                                                                                                                                                                                                      |
| National                                     |                      |          |     |     | 15.8%                |          |     |     |                                                                                                                                                                                                                      |
| World                                        |                      |          |     |     | 10.6%                |          |     |     | Ditto with respect to charity effectiveness in achieving goal of relief from COVID-19.                                                                                                                               |
| <b>Goal Effectiveness</b>                    |                      |          |     |     |                      |          |     |     |                                                                                                                                                                                                                      |
| No difference                                |                      |          |     |     | 15.8%                |          |     |     |                                                                                                                                                                                                                      |
| Regional                                     |                      |          |     |     | 39.9%                |          |     |     |                                                                                                                                                                                                                      |
| National                                     |                      |          |     |     | 27.2%                |          |     |     | Ditto with respect to charity most helping for self in relation to COVID-19.                                                                                                                                         |
| World                                        |                      |          |     |     | 17.1%                |          |     |     |                                                                                                                                                                                                                      |
| <b>Most Helping Self</b>                     |                      |          |     |     |                      |          |     |     |                                                                                                                                                                                                                      |
| No difference                                |                      |          |     |     | 10.3%                |          |     |     |                                                                                                                                                                                                                      |
| Regional                                     |                      |          |     |     | 68.5%                |          |     |     | Ditto with respect to identification of people most in need from COVID-19.                                                                                                                                           |
| National                                     |                      |          |     |     | 20.0%                |          |     |     |                                                                                                                                                                                                                      |
| World                                        |                      |          |     |     | 1.3%                 |          |     |     |                                                                                                                                                                                                                      |
| <b>People Most in Need</b>                   |                      |          |     |     |                      |          |     |     |                                                                                                                                                                                                                      |
| No difference                                |                      |          |     |     | 38.7%                |          |     |     | Ditto with respect to identification of people most in need from COVID-19.                                                                                                                                           |
| Regional                                     |                      |          |     |     | 3.6%                 |          |     |     |                                                                                                                                                                                                                      |
| National                                     |                      |          |     |     | 10.6%                |          |     |     |                                                                                                                                                                                                                      |
| World                                        |                      |          |     |     | 47.1%                |          |     |     |                                                                                                                                                                                                                      |
| <b>Expectation of Others’ Contribution</b>   |                      |          |     |     |                      |          |     |     | <b>Q70bis</b>                                                                                                                                                                                                        |
| Regional                                     |                      |          |     |     | 44.7%                |          |     |     | Ditto with respect to identification of charity most chosen by other participants.                                                                                                                                   |
| National                                     |                      |          |     |     | 50.3%                |          |     |     |                                                                                                                                                                                                                      |
| World                                        |                      |          |     |     | 5.0%                 |          |     |     |                                                                                                                                                                                                                      |
| Number of Observations                       |                      | 932      |     |     |                      | 723      |     |     |                                                                                                                                                                                                                      |
| Number of Donors                             |                      | 589      |     |     |                      | 556      |     |     |                                                                                                                                                                                                                      |

**Supplementary Table 1 | Descriptive statistics of samples.** The last column indicates the question in the survey from which the variable has been derived, and describes how the variable has been constructed.

| DEP VAR                     | United States |           |           |           | Italy     |           |           |           |
|-----------------------------|---------------|-----------|-----------|-----------|-----------|-----------|-----------|-----------|
|                             | Model 1       |           | Model 2   |           | Model 1   |           | Model 2   |           |
|                             | <i>P</i>      | <i>CD</i> | <i>P</i>  | <i>CD</i> | <i>P</i>  | <i>CD</i> | <i>P</i>  | <i>CD</i> |
|                             | (1)           | (2)       | (3)       | (4)       | (5)       | (6)       | (7)       | (8)       |
| Age                         | 0.003**       | 0.003**   | 0.003**   | 0.004**   | 0.002     | 0.001     | 0.002     | 0.001     |
|                             | [0.001]       | [0.001]   | [0.001]   | [0.001]   | [0.001]   | [0.002]   | [0.001]   | [0.002]   |
| Female                      | 0.101***      | 0.104***  | 0.097***  | 0.100**   | 0.055*    | 0.049     | 0.053*    | 0.046     |
|                             | [0.023]       | [0.031]   | [0.023]   | [0.031]   | [0.026]   | [0.031]   | [0.026]   | [0.031]   |
| Education Level             | -0.011        | -0.014    | -0.012    | -0.014    | 0.024*    | 0.006     | 0.023+    | 0.004     |
|                             | [0.010]       | [0.013]   | [0.010]   | [0.013]   | [0.012]   | [0.014]   | [0.012]   | [0.014]   |
| Small/Medium Metro Area     | 0.018         | 0.039     | 0.02      | 0.043     | -0.008    | -0.059+   | -0.007    | -0.059+   |
|                             | [0.030]       | [0.042]   | [0.030]   | [0.042]   | [0.029]   | [0.034]   | [0.029]   | [0.034]   |
| Large Metropolitan Area     | 0.021         | -0.002    | 0.016     | -0.008    | 0.016     | -0.042    | 0.017     | -0.041    |
|                             | [0.038]       | [0.052]   | [0.038]   | [0.052]   | [0.040]   | [0.047]   | [0.040]   | [0.047]   |
| Rooted                      | -0.001        | -0.039    | -0.003    | -0.039    | 0.016     | 0.007     | 0.015     | 0.006     |
|                             | [0.027]       | [0.037]   | [0.027]   | [0.037]   | [0.041]   | [0.049]   | [0.041]   | [0.049]   |
| Midwest                     | 0.007         | -0.023    | 0.011     | -0.018    |           |           |           |           |
|                             | [0.033]       | [0.044]   | [0.033]   | [0.044]   |           |           |           |           |
| South                       | -0.01         | -0.063    | -0.005    | -0.057    |           |           |           |           |
|                             | [0.033]       | [0.045]   | [0.033]   | [0.045]   |           |           |           |           |
| West                        | -0.027        | -0.043    | -0.021    | -0.034    |           |           |           |           |
|                             | [0.032]       | [0.045]   | [0.032]   | [0.045]   |           |           |           |           |
| South Italy                 |               |           |           |           | -0.035    | 0.017     | -0.026    | 0.028     |
|                             |               |           |           |           | [0.029]   | [0.034]   | [0.029]   | [0.034]   |
| Conservative scale          | -0.051***     | -0.058*** | -0.049*** | -0.055*** | -0.092*** | -0.088*** | -0.090*** | -0.086*** |
|                             | [0.010]       | [0.013]   | [0.010]   | [0.013]   | [0.014]   | [0.016]   | [0.014]   | [0.016]   |
| Income                      | 0.019***      | 0.015+    | 0.018**   | 0.013+    | 0.006     | 0.007     | 0.006     | 0.007     |
|                             | [0.006]       | [0.008]   | [0.006]   | [0.008]   | [0.007]   | [0.008]   | [0.007]   | [0.008]   |
| Income Lost                 | -0.026        | -0.017    | -0.029    | -0.021    | 0.019     | 0.039     | 0.019     | 0.038     |
|                             | [0.023]       | [0.032]   | [0.023]   | [0.032]   | [0.028]   | [0.033]   | [0.028]   | [0.033]   |
| Priming State/Region        | -0.057+       | -0.012    | -0.055+   | -0.007    | 0.03      | 0.046     | 0.028     | 0.042     |
|                             | [0.033]       | [0.044]   | [0.033]   | [0.044]   | [0.036]   | [0.043]   | [0.036]   | [0.044]   |
| Priming Country             | -0.059+       | -0.069    | -0.058+   | -0.066    | 0.034     | 0.008     | 0.038     | 0.012     |
|                             | [0.033]       | [0.044]   | [0.033]   | [0.044]   | [0.038]   | [0.045]   | [0.038]   | [0.045]   |
| Priming World               | -0.027        | -0.01     | -0.024    | -0.006    | 0.027     | 0.032     | 0.027     | 0.032     |
|                             | [0.033]       | [0.043]   | [0.033]   | [0.043]   | [0.036]   | [0.044]   | [0.036]   | [0.044]   |
| County-level COVID Exposure | 0.001         | 0.00      | 0.001     | 0.00      | 0.001     | 0.003+    | 0.001     | 0.003     |
|                             | [0.002]       | [0.003]   | [0.002]   | [0.003]   | [0.002]   | [0.002]   | [0.002]   | [0.002]   |
| Personal COVID Exposure     |               |           | 0.058*    | 0.077*    |           |           | 0.045+    | 0.054+    |
|                             |               |           | [0.024]   | [0.033]   |           |           | [0.027]   | [0.032]   |
| LR chi2                     | 88.66         | 48.62     | 95.04     | 53.96     | 83.81     | 41.23     | 87.07     | 44.05     |
| Observations                | 932           | 932       | 932       | 932       | 723       | 723       | 723       | 723       |

**Supplementary Table 2a | Econometric analysis of probability of being a donor (*P*) and of conditional donation (*CD*).** Estimates of marginal effects from two-part hurdle models are reported. The dependent variable is the share of bonus donated to a charity, without identifying which charity had been chosen. *CD* is the amount donated conditional on being a donor. The first column in each model reports the marginal effects from a Probit model to estimate *P*. The second column in each model reports the marginal effects for *CD*. Variables are defined in Supplementary Table 1. Standard errors are in brackets. \*\*\* p<0.001, \*\* p<0.01, \* p<0.05, + p<0.10

|                             | United States        |                      | Italy                |                      |
|-----------------------------|----------------------|----------------------|----------------------|----------------------|
|                             | Model 1              | Model 2              | Model 1              | Model 2              |
|                             | <i>CD</i>            | <i>CD</i>            | <i>CD</i>            | <i>CD</i>            |
| DEP VAR                     | (1)                  | (2)                  | (3)                  | (4)                  |
| National Charity            | 0.036+<br>[0.019]    | 0.037+<br>[0.019]    | 0.044*<br>[0.020]    | 0.045*<br>[0.020]    |
| International Charity       | 0.057**<br>[0.021]   | 0.057**<br>[0.021]   | 0.140***<br>[0.023]  | 0.140***<br>[0.023]  |
| Age                         | 0.003**<br>[0.001]   | 0.003***<br>[0.001]  | 0.002+<br>[0.001]    | 0.002+<br>[0.001]    |
| Female                      | 0.100***<br>[0.022]  | 0.096***<br>[0.022]  | 0.063*<br>[0.025]    | 0.061*<br>[0.026]    |
| Education Level             | -0.011<br>[0.009]    | -0.011<br>[0.009]    | 0.023*<br>[0.012]    | 0.022+<br>[0.012]    |
| Small/Medium Metro Area     | 0.017<br>[0.030]     | 0.02<br>[0.030]      | -0.005<br>[0.028]    | -0.005<br>[0.028]    |
| Large Metropolitan Area     | 0.02<br>[0.038]      | 0.016<br>[0.037]     | 0.021<br>[0.039]     | 0.021<br>[0.039]     |
| Rooted                      | 0.002<br>[0.026]     | 0.001<br>[0.026]     | 0.028<br>[0.040]     | 0.027<br>[0.040]     |
| Midwest                     | 0.006<br>[0.032]     | 0.009<br>[0.032]     |                      |                      |
| South                       | -0.015<br>[0.033]    | -0.01<br>[0.033]     |                      |                      |
| West                        | -0.03<br>[0.032]     | -0.024<br>[0.032]    |                      |                      |
| South Italy                 |                      |                      | -0.036<br>[0.028]    | -0.028<br>[0.028]    |
| Conservative scale          | -0.048***<br>[0.010] | -0.046***<br>[0.010] | -0.070***<br>[0.014] | -0.069***<br>[0.014] |
| Income                      | 0.019***<br>[0.006]  | 0.018**<br>[0.006]   | 0.007<br>[0.007]     | 0.007<br>[0.007]     |
| Income Lost                 | -0.028<br>[0.023]    | -0.031<br>[0.023]    | 0.021<br>[0.027]     | 0.021<br>[0.027]     |
| Priming State/Region        | -0.055+<br>[0.032]   | -0.053<br>[0.032]    | 0.035<br>[0.035]     | 0.033<br>[0.035]     |
| Priming Country             | -0.058+<br>[0.033]   | -0.056+<br>[0.032]   | 0.033<br>[0.037]     | 0.036<br>[0.037]     |
| Priming World               | -0.029<br>[0.032]    | -0.026<br>[0.032]    | 0.016<br>[0.035]     | 0.016<br>[0.035]     |
| County-level COVID Exposure | 0.001<br>[0.002]     | 0.001<br>[0.002]     | 0<br>[0.002]         | 0<br>[0.002]         |
| Personal COVID Exposure     |                      | 0.057*<br>[0.023]    |                      | 0.038<br>[0.026]     |
| LR chi2                     | 97.15                | 103.54               | 118.36               | 121.29               |
| Observations                | 932                  | 932                  | 723                  | 723                  |

**Supplementary Table 2b | Econometric analysis of probability of being a donor (*P*) and of conditional donation (*CD*).** See Supplementary Table 1 for variables definition and Supplementary Table 2a for model description.

| United States & Italy       |           |           |           |           |
|-----------------------------|-----------|-----------|-----------|-----------|
| DEP VAR                     | Model 1   |           | Model 2   |           |
|                             | <i>P</i>  | <i>CD</i> | <i>P</i>  | <i>CD</i> |
|                             | (1)       | (2)       | (3)       | (4)       |
| Age                         | 0.003***  | 0.002*    | 0.003***  | 0.002*    |
|                             | [0.001]   | [0.001]   | [0.001]   | [0.001]   |
| Female                      | 0.081***  | 0.076***  | 0.082***  | 0.076***  |
|                             | [0.017]   | [0.022]   | [0.017]   | [0.022]   |
| Education Level             | 0.003     | -0.006    | 0.002     | -0.006    |
|                             | [0.007]   | [0.010]   | [0.007]   | [0.010]   |
| Small/Medium Metro Area     | 0.007     | -0.015    | 0.006     | -0.016    |
|                             | [0.020]   | [0.026]   | [0.020]   | [0.026]   |
| Large Metropolitan Area     | 0.005     | -0.032    | 0.003     | -0.035    |
|                             | [0.026]   | [0.034]   | [0.026]   | [0.034]   |
| Rooted                      | 0.005     | -0.017    | 0.003     | -0.02     |
|                             | [0.022]   | [0.028]   | [0.022]   | [0.028]   |
| Conservative scale          | -0.063*** | -0.065*** | -0.050*** | -0.051*** |
|                             | [0.008]   | [0.010]   | [0.010]   | [0.012]   |
| Income                      | 0.013**   | 0.011*    | 0.013**   | 0.011+    |
|                             | [0.004]   | [0.006]   | [0.004]   | [0.006]   |
| Income Lost                 | -0.007    | 0.003     | -0.007    | 0.003     |
|                             | [0.018]   | [0.023]   | [0.018]   | [0.023]   |
| Priming State/Region        | -0.022    | 0.016     | -0.022    | 0.017     |
|                             | [0.024]   | [0.031]   | [0.024]   | [0.031]   |
| Priming Country             | -0.017    | -0.031    | -0.016    | -0.029    |
|                             | [0.025]   | [0.032]   | [0.025]   | [0.032]   |
| Priming World               | -0.001    | 0.012     | 0.000     | 0.012     |
|                             | [0.024]   | [0.031]   | [0.024]   | [0.031]   |
| County-level COVID Exposure | 0.001     | 0.002     | 0.001     | 0.002     |
|                             | [0.001]   | [0.002]   | [0.001]   | [0.002]   |
| Personal COVID Exposure     | 0.053**   | 0.064**   | 0.059*    | 0.068*    |
|                             | [0.018]   | [0.023]   | [0.024]   | [0.030]   |
| Italy                       | 0.161***  | 0.149***  | 0.265***  | 0.269***  |
|                             | [0.021]   | [0.026]   | [0.048]   | [0.057]   |
| Conservative X Ita          |           |           | -0.041*   | -0.050*   |
|                             |           |           | [0.017]   | [0.023]   |
| Personal Exposure X Ita     |           |           | -0.012    | -0.011    |
|                             |           |           | [0.036]   | [0.046]   |
| LR chi2                     | 197.05    | 116.49    | 203.22    | 121.4     |
| Observations                | 1,655     | 1,655     | 1,655     | 1,655     |

**Supplementary Table 2c | Econometric analysis of probability of being a donor and of conditional donation - Pooled data.** The “X” operator indicates an interaction term of the two variables that it separates. See Supplementary Table 1 for variables definition and Supplementary Table 2a for model description.

| DEP VAR                           | United States |           | Italy     |           |
|-----------------------------------|---------------|-----------|-----------|-----------|
|                                   | Model 1       |           | Model 1   |           |
|                                   | <i>P</i>      | <i>CD</i> | <i>P</i>  | <i>CD</i> |
|                                   | (1)           | (2)       | (3)       | (4)       |
| Age                               | 0.003**       | 0.004**   | 0.002     | 0.001     |
|                                   | [0.001]       | [0.001]   | [0.001]   | [0.002]   |
| Female                            | 0.097***      | 0.099**   | 0.053*    | 0.046     |
|                                   | [0.023]       | [0.031]   | [0.026]   | [0.031]   |
| Education Level                   | -0.012        | -0.014    | 0.023+    | 0.004     |
|                                   | [0.010]       | [0.013]   | [0.012]   | [0.014]   |
| Small/Medium Metro Area           | 0.023         | 0.044     | -0.004    | -0.057+   |
|                                   | [0.030]       | [0.041]   | [0.029]   | [0.034]   |
| Large Metropolitan Area           | 0.018         | -0.007    | 0.017     | -0.034    |
|                                   | [0.038]       | [0.052]   | [0.039]   | [0.046]   |
| Rooted                            | -0.004        | -0.04     | 0.013     | 0.002     |
|                                   | [0.027]       | [0.037]   | [0.041]   | [0.049]   |
| Midwest                           | 0.007         | -0.021    |           |           |
|                                   | [0.033]       | [0.045]   |           |           |
| South                             | -0.007        | -0.058    |           |           |
|                                   | [0.033]       | [0.045]   |           |           |
| West                              | -0.023        | -0.036    |           |           |
|                                   | [0.033]       | [0.045]   |           |           |
| South Italy                       |               |           | 0.001     | 0.042     |
|                                   |               |           | [0.038]   | [0.044]   |
| Conservative scale                | -0.049***     | -0.055*** | -0.090*** | -0.087*** |
|                                   | [0.010]       | [0.013]   | [0.014]   | [0.016]   |
| Income                            | 0.018**       | 0.013+    | 0.006     | 0.008     |
|                                   | [0.006]       | [0.008]   | [0.007]   | [0.008]   |
| Income Lost                       | -0.029        | -0.021    | 0.016     | 0.037     |
|                                   | [0.023]       | [0.032]   | [0.028]   | [0.033]   |
| Priming State/Region              | -0.055+       | -0.006    | 0.028     | 0.044     |
|                                   | [0.033]       | [0.044]   | [0.036]   | [0.044]   |
| Priming Country                   | -0.056+       | -0.065    | 0.042     | 0.02      |
|                                   | [0.033]       | [0.044]   | [0.038]   | [0.045]   |
| Priming World                     | -0.024        | -0.006    | 0.031     | 0.037     |
|                                   | [0.033]       | [0.043]   | [0.036]   | [0.044]   |
| State/Region-level COVID Exposure | -0.001        | -0.001    | 0.019     | 0.018     |
|                                   | [0.002]       | [0.002]   | [0.016]   | [0.019]   |
| Personal COVID Exposure           | 0.058*        | 0.077*    | 0.042     | 0.055+    |
|                                   | [0.024]       | [0.033]   | [0.027]   | [0.032]   |
| LR chi2                           | 94.98         | 54.06     | 85.62     | 42.84     |
| Observations                      | 932           | 932       | 723       | 723       |

**Supplementary Table 3 | Econometric analysis of probability of being a donor and of conditional donation - U.S. and Italy. Deaths count.** See notes to Supplementary Table 2a. Environmental COVID-19 exposure is here measured by the number of deaths in the state (for U.S.) or region (for Italy), where the participant resides. See Supplementary Table 1 for variables definition and Supplementary Table 2a for model description.

|                             | United States        | Italy                | United States & Italy |                      |
|-----------------------------|----------------------|----------------------|-----------------------|----------------------|
|                             | Model 1              | Model 1              | Model 1               | Model 2              |
| DEP VAR                     | <i>AD</i>            | <i>AD</i>            | <i>AD</i>             | <i>AD</i>            |
|                             | (1)                  | (2)                  | (3)                   | (4)                  |
| National Charity            | -0.857***<br>[0.078] | -0.168+<br>[0.096]   | -0.566***<br>[0.060]  | -1.677***<br>[0.186] |
| International Charity       | -1.059***<br>[0.083] | -0.460***<br>[0.095] | -0.813***<br>[0.063]  | -1.838***<br>[0.210] |
| Age                         | 0.004*<br>[0.002]    | 0.002<br>[0.002]     | 0.004*<br>[0.001]     | 0.004**<br>[0.001]   |
| Female                      | 0.165***<br>[0.045]  | 0.077+<br>[0.041]    | 0.128***<br>[0.031]   | 0.129***<br>[0.031]  |
| Education Level             | -0.026<br>[0.018]    | 0.025<br>[0.021]     | -0.002<br>[0.014]     | -0.003<br>[0.013]    |
| Small/Medium Metro Area     | 0.051<br>[0.060]     | -0.044<br>[0.046]    | -0.001<br>[0.035]     | -0.001<br>[0.038]    |
| Large Metropolitan Area     | 0.018<br>[0.072]     | -0.016<br>[0.068]    | -0.01<br>[0.044]      | -0.012<br>[0.046]    |
| Rooted                      | -0.042<br>[0.052]    | 0.009<br>[0.068]     | -0.012<br>[0.041]     | -0.018<br>[0.041]    |
| Midwest                     | 0.003<br>[0.060]     |                      |                       |                      |
| South                       | -0.017<br>[0.065]    |                      |                       |                      |
| West                        | -0.037<br>[0.063]    |                      |                       |                      |
| South Italy                 |                      | 0.001<br>[0.045]     |                       |                      |
| Conservative scale          | -0.098***<br>[0.019] | -0.159***<br>[0.025] | -0.123***<br>[0.015]  | -0.122***<br>[0.016] |
| Income                      | 0.024*<br>[0.011]    | 0.008<br>[0.012]     | 0.019*<br>[0.008]     | 0.018*<br>[0.008]    |
| Income Lost                 | -0.039<br>[0.045]    | 0.038<br>[0.045]     | -0.005<br>[0.034]     | -0.003<br>[0.032]    |
| Priming State/Region        | -0.065<br>[0.060]    | 0.048<br>[0.060]     | -0.018<br>[0.042]     | -0.017<br>[0.041]    |
| Priming Country             | -0.095<br>[0.064]    | 0.046<br>[0.062]     | -0.033<br>[0.043]     | -0.032<br>[0.045]    |
| Priming World               | -0.025<br>[0.060]    | 0.056<br>[0.062]     | 0.008<br>[0.041]      | 0.011<br>[0.043]     |
| County Level COVID Exposure | 0.000<br>[0.004]     | 0.003<br>[0.003]     | 0.003<br>[0.002]      | 0.002<br>[0.002]     |
| Personal COVID Exposure     | 0.104*<br>[0.047]    | 0.078+<br>[0.045]    | 0.090**<br>[0.032]    | 0.091**<br>[0.031]   |
| Italy                       |                      |                      | 0.264***<br>[0.040]   |                      |
| Local level X Ita           |                      |                      |                       | -0.163*<br>[0.069]   |
| Country level X Ita         |                      |                      |                       | 0.598***<br>[0.087]  |
| World level X Ita           |                      |                      |                       | 0.544***<br>[0.103]  |
| Constant                    | -0.335*<br>[0.150]   | -0.519**<br>[0.160]  | -0.554***<br>[0.107]  | -0.194<br>[0.150]    |
| Observations                | 2,796                | 2,169                | 4,965                 | 4,965                |
| Number of ID                | 932                  | 723                  | 1655                  | 1655                 |

**Supplementary Table 4 | Econometric analysis of Aggregate Donations with panel model - US, Italy and pooled country data.** Coefficient estimates from a Tobit model of donation using charity choice as the panel dimension. Heteroschedasticity-robust standard errors were computed through the bootstrap method with 1,000 repetitions. The tests on the null hypotheses that charity choice dummy coefficients were equal to each other were either taken from the Table (for pairwise comparisons including the local charity) or from a post-estimation chi2 test (not reported in the Table). The “X” operator indicates an interaction term of the two variables it separates. See Supplementary Table 1 for variables’ definition.

| DEP VAR: AD             | United States |         |          |          |         |         |          |         |         | Italy   |         |         |         |         |         |         |         |         |
|-------------------------|---------------|---------|----------|----------|---------|---------|----------|---------|---------|---------|---------|---------|---------|---------|---------|---------|---------|---------|
|                         | Model 1       |         |          | Model 2  |         |         | Model 3  |         |         | Model 1 |         |         | Model 2 |         |         | Model 3 |         |         |
|                         | State         | Country | World    | State    | Country | World   | State    | Country | World   | Region  | Country | World   | Region  | Country | World   | Region  | Country | World   |
|                         | (1)           | (2)     | (3)      | (4)      | (5)     | (6)     | (7)      | (8)     | (9)     | (10)    | (11)    | (12)    | (13)    | (14)    | (15)    | (16)    | (17)    | (18)    |
| Age                     | 0.009***      | -0.011* | 0.00     | 0.008*** | -0.011* | 0.002   | 0.009*** | -0.011* | 0.00    | 0.009** | -       | 0.002   | 0.007*  | -0.010* | 0.005   | 0.007*  | -0.011* | 0.005   |
|                         | [0.002]       | [0.005] | [0.006]  | [0.002]  | [0.005] | [0.006] | [0.002]  | [0.005] | [0.006] | [0.003] | [0.004] | [0.006] | [0.003] | [0.004] | [0.006] | [0.003] | [0.004] | [0.006] |
| Female                  | 0.131**       | 0.124   | 0.086    | 0.138**  | 0.117   | 0.07    | 0.117*   | 0.163   | 0.13    | 0.144*  | 0.06    | -0.127  | 0.165*  | 0.043   | -0.142  | 0.173*  | 0.046   | -0.119  |
|                         | [0.049]       | [0.108] | [0.135]  | [0.048]  | [0.107] | [0.133] | [0.048]  | [0.108] | [0.135] | [0.067] | [0.081] | [0.123] | [0.067] | [0.081] | [0.121] | [0.069] | [0.084] | [0.124] |
| Education Level         | -0.004        | -0.078+ | 0.017    | -0.006   | -0.075+ | 0.019   | -0.013   | -0.056  | 0.015   | 0.005   | 0.019   | 0.027   | 0.024   | -0.001  | 0.028   | 0.017   | -0.002  | 0.009   |
|                         | [0.020]       | [0.044] | [0.056]  | [0.020]  | [0.044] | [0.055] | [0.022]  | [0.049] | [0.063] | [0.030] | [0.038] | [0.054] | [0.030] | [0.038] | [0.053] | [0.032] | [0.040] | [0.056] |
| Small/Medium Metro Area | 0.065         | -0.056  | 0.169    | 0.052    | -0.067  | 0.205   | 0.063    | -0.014  | 0.212   | 0.019   | -0.115  | 0.007   | 0.022   | -0.139  | 0.038   | 0.02    | -0.151  | 0.059   |
|                         | [0.065]       | [0.142] | [0.187]  | [0.064]  | [0.142] | [0.187] | [0.064]  | [0.143] | [0.188] | [0.073] | [0.091] | [0.134] | [0.071] | [0.090] | [0.131] | [0.073] | [0.093] | [0.133] |
| Large Metropolitan Area | 0.026         | 0.00    | 0.00     | -0.001   | -0.014  | 0.065   | 0.025    | 0.04    | 0.05    | -0.1    | 0.185   | -0.202  | -0.073  | 0.124   | -0.176  | -0.064  | 0.089   | -0.063  |
|                         | [0.080]       | [0.174] | [0.229]  | [0.079]  | [0.174] | [0.228] | [0.079]  | [0.177] | [0.230] | [0.103] | [0.116] | [0.189] | [0.101] | [0.115] | [0.185] | [0.105] | [0.121] | [0.191] |
| Rooted                  | 0.013         | 0.047   | -0.305*  | 0.003    | 0.025   | -0.305* | 0.002    | -0.047  | -0.350* | -0.067  | 0.487** | -0.373* | -0.068  | 0.457** | -0.339* | -0.030  | 0.448** | -0.372* |
|                         | [0.058]       | [0.124] | [0.148]  | [0.057]  | [0.123] | [0.145] | [0.057]  | [0.123] | [0.148] | [0.103] | [0.153] | [0.174] | [0.101] | [0.151] | [0.168] | [0.103] | [0.153] | [0.170] |
| Midwest                 | -0.009        | -0.044  | 0.109    | 0.033    | -0.07   | 0.019   | 0.027    | -0.097  | -0.031  |         |         |         |         |         |         |         |         |         |
|                         | [0.068]       | [0.159] | [0.192]  | [0.067]  | [0.158] | [0.191] | [0.067]  | [0.157] | [0.193] |         |         |         |         |         |         |         |         |         |
| South                   | -0.117+       | 0.212   | 0.069    | -0.097   | 0.166   | -0.014  | -0.095   | 0.119   | -0.019  |         |         |         |         |         |         |         |         |         |
|                         | [0.071]       | [0.154] | [0.196]  | [0.069]  | [0.152] | [0.194] | [0.070]  | [0.152] | [0.195] |         |         |         |         |         |         |         |         |         |
| West                    | -0.094        | 0.093   | 0.091    | -0.098   | 0.112   | 0.098   | -0.118+  | 0.09    | 0.094   |         |         |         |         |         |         |         |         |         |
|                         | [0.070]       | [0.156] | [0.195]  | [0.069]  | [0.155] | [0.192] | [0.069]  | [0.155] | [0.195] |         |         |         |         |         |         |         |         |         |
| South Italy             |               |         |          |          |         |         |          |         |         | -0.049  | 0.057   | -0.015  | -0.042  | 0.051   | -0.012  | -0.047  | 0.095   | -0.035  |
|                         |               |         |          |          |         |         |          |         |         | [0.074] | [0.090] | [0.133] | [0.072] | [0.089] | [0.129] | [0.076] | [0.094] | [0.135] |
| Conservative scale      | -0.032        | -0.095* | -0.183** | -0.045+  | -0.121* | -0.126+ | -0.029   | -0.102+ | -0.111  | 0.084*  | -0.051  | -       | 0.044   | -0.062  | -       | 0.034   | -0.046  | -       |
|                         | [0.021]       | [0.047] | [0.063]  | [0.023]  | [0.054] | [0.069] | [0.024]  | [0.056] | [0.071] | [0.036] | [0.046] | [0.088] | [0.037] | [0.048] | [0.084] | [0.038] | [0.049] | [0.086] |
| Income                  | 0.027*        | 0.012   | 0.00     | 0.021+   | 0.015   | 0.013   | 0.016    | 0.018   | 0.01    | 0.004   | 0.044*  | -0.042  | -0.007  | 0.044*  | -0.02   | -0.011  | 0.044*  | -0.014  |
|                         | [0.012]       | [0.026] | [0.033]  | [0.012]  | [0.026] | [0.032] | [0.013]  | [0.027] | [0.034] | [0.018] | [0.021] | [0.032] | [0.018] | [0.021] | [0.032] | [0.018] | [0.022] | [0.032] |
| Income Lost             | -0.082        | 0.058   | 0.057    | -0.085+  | 0.035   | 0.058   | -0.085+  | 0.027   | 0.07    | 0.014   | 0.129   | -0.063  | 0.021   | 0.111   | -0.073  | 0.016   | 0.134   | -0.053  |
|                         | [0.050]       | [0.108] | [0.135]  | [0.050]  | [0.108] | [0.134] | [0.050]  | [0.109] | [0.136] | [0.072] | [0.087] | [0.132] | [0.071] | [0.086] | [0.128] | [0.072] | [0.089] | [0.131] |
| Priming State/Region    | -0.022        | -0.071  | -0.134   | -0.033   | -0.078  | -0.113  | -0.009   | -0.094  | -0.132  | 0.169+  | -0.051  | -0.069  | 0.198*  | -0.098  | -0.099  | 0.221*  | -0.095  | -0.131  |
|                         | [0.068]       | [0.151] | [0.196]  | [0.067]  | [0.150] | [0.195] | [0.068]  | [0.151] | [0.198] | [0.094] | [0.110] | [0.179] | [0.092] | [0.109] | [0.174] | [0.095] | [0.112] | [0.180] |
| Priming Country         | -0.091        | -0.048  | -0.083   | -0.09    | -0.064  | -0.045  | -0.07    | -0.06   | -0.039  | 0.118   | -0.087  | 0.084   | 0.128   | -0.096  | 0.039   | 0.122   | -0.122  | 0.049   |
|                         | [0.069]       | [0.149] | [0.194]  | [0.067]  | [0.148] | [0.192] | [0.068]  | [0.148] | [0.193] | [0.096] | [0.113] | [0.176] | [0.094] | [0.111] | [0.171] | [0.098] | [0.116] | [0.177] |
| Priming World           | -0.06         | -0.121  | 0.228    | -0.067   | -0.12   | 0.256   | -0.039   | -0.119  | 0.266   | 0.125   | -0.268* | 0.372*  | 0.133   | -0.287* | 0.331*  | 0.155+  | -0.297* | 0.342*  |
|                         | [0.067]       | [0.147] | [0.180]  | [0.066]  | [0.146] | [0.179] | [0.066]  | [0.145] | [0.181] | [0.094] | [0.117] | [0.168] | [0.092] | [0.115] | [0.163] | [0.094] | [0.119] | [0.167] |

| (Continued)                     |          |         |          | United States |          |          |          |         |          | Italy     |         |         |          |           |          |          |           |          |
|---------------------------------|----------|---------|----------|---------------|----------|----------|----------|---------|----------|-----------|---------|---------|----------|-----------|----------|----------|-----------|----------|
|                                 | (1)      | (2)     | (3)      | (4)           | (5)      | (6)      | (7)      | (8)     | (9)      | (10)      | (11)    | (12)    | (13)     | (14)      | (15)     | (16)     | (17)      | (18)     |
| County-level COVID Exposure     | 0.001    | -0.008  | 0.006    | 0.001         | -0.006   | 0.007    | 0.00     | -0.009  | 0.006    | -0.003    | 0.006   | 0.013   | -0.002   | 0.003     | 0.014    | -0.003   | 0.003     | 0.014    |
|                                 | [0.004]  | [0.009] | [0.013]  | [0.004]       | [0.009]  | [0.013]  | [0.004]  | [0.009] | [0.013]  | [0.004]   | [0.005] | [0.009] | [0.004]  | [0.005]   | [0.009]  | [0.004]  | [0.005]   | [0.009]  |
| Personal COVID Exposure         | 0.087+   | 0.076   | 0.085    | 0.065         | 0.069    | 0.051    | 0.07     | 0.023   | 0.04     | 0.069     | -0.089  | 0.227+  | 0.056    | -0.059    | 0.186    | 0.06     | -0.059    | 0.169    |
|                                 | [0.051]  | [0.111] | [0.139]  | [0.050]       | [0.112]  | [0.139]  | [0.051]  | [0.113] | [0.142]  | [0.068]   | [0.083] | [0.127] | [0.067]  | [0.083]   | [0.125]  | [0.070]  | [0.086]   | [0.128]  |
| Local Social Identity           |          |         |          | 0.214***      | -0.208** | -0.270** | 0.157*** | -0.203* | -0.310** |           |         |         | 0.298*** | -0.271*** | -0.132   | 0.308*** | -0.296*** | -0.178   |
|                                 |          |         |          | [0.035]       | [0.080]  | [0.102]  | [0.039]  | [0.089] | [0.113]  |           |         |         | [0.055]  | [0.069]   | [0.100]  | [0.063]  | [0.080]   | [0.115]  |
| National Social Identity        |          |         |          | -0.021        | 0.202*   | -0.037   | -0.012   | 0.273** | -0.086   |           |         |         | -0.119*  | 0.315***  | -0.218*  | -0.145*  | 0.349***  | -0.252*  |
|                                 |          |         |          | [0.038]       | [0.088]  | [0.108]  | [0.042]  | [0.096] | [0.120]  |           |         |         | [0.055]  | [0.071]   | [0.101]  | [0.063]  | [0.082]   | [0.115]  |
| Global Social Identity          |          |         |          | -0.053        | 0.093    | 0.292**  | -0.071*  | 0.065   | 0.270**  |           |         |         | -0.095*  | -0.049    | 0.489*** | -0.09    | -0.039    | 0.461*** |
|                                 |          |         |          | [0.033]       | [0.069]  | [0.089]  | [0.036]  | [0.074] | [0.094]  |           |         |         | [0.048]  | [0.060]   | [0.102]  | [0.055]  | [0.068]   | [0.113]  |
| Trust People from State/Region  |          |         |          |               |          |          | 0.064    | -0.135  | 0.126    |           |         |         |          |           |          | -0.042   | 0.001     | 0.159    |
|                                 |          |         |          |               |          |          | [0.045]  | [0.098] | [0.127]  |           |         |         |          |           |          | [0.058]  | [0.071]   | [0.108]  |
| Trust People from Country       |          |         |          |               |          |          | -0.075+  | -0.13   | 0.014    |           |         |         |          |           |          | 0.011    | -0.021    | 0.105    |
|                                 |          |         |          |               |          |          | [0.040]  | [0.089] | [0.114]  |           |         |         |          |           |          | [0.057]  | [0.071]   | [0.105]  |
| Trust People from Other Country |          |         |          |               |          |          | 0.034    | 0.219** | 0.11     |           |         |         |          |           |          | -0.04    | 0.061     | -0.006   |
|                                 |          |         |          |               |          |          | [0.037]  | [0.084] | [0.106]  |           |         |         |          |           |          | [0.053]  | [0.066]   | [0.103]  |
| Trust Local Community           |          |         |          |               |          |          | 0.079*   | 0.142   | -0.011   |           |         |         |          |           |          | 0.033    | 0.065     | -0.168   |
|                                 |          |         |          |               |          |          | [0.040]  | [0.089] | [0.113]  |           |         |         |          |           |          | [0.056]  | [0.071]   | [0.104]  |
| PSYC Vulnerability              |          |         |          |               |          |          | 0.081    | -0.094  | -0.092   |           |         |         |          |           |          | 0.018    | -0.106    | -0.219   |
|                                 |          |         |          |               |          |          | [0.068]  | [0.154] | [0.188]  |           |         |         |          |           |          | [0.104]  | [0.133]   | [0.198]  |
| Social Relationships Loss       |          |         |          |               |          |          | 0.036    | 0.045   | -0.011   |           |         |         |          |           |          | 0.252    | -0.352+   | -0.006   |
|                                 |          |         |          |               |          |          | [0.097]  | [0.209] | [0.266]  |           |         |         |          |           |          | [0.155]  | [0.197]   | [0.285]  |
| Employees/self-employed         |          |         |          |               |          |          | 0.014    | -0.163  | -0.078   |           |         |         |          |           |          | 0.117    | -0.003    | 0.082    |
|                                 |          |         |          |               |          |          | [0.068]  | [0.151] | [0.193]  |           |         |         |          |           |          | [0.086]  | [0.106]   | [0.157]  |
| Professionals/Managers          |          |         |          |               |          |          | 0.013    | -0.152  | 0.028    |           |         |         |          |           |          | 0.083    | 0.023     | 0.013    |
|                                 |          |         |          |               |          |          | [0.067]  | [0.141] | [0.190]  |           |         |         |          |           |          | [0.091]  | [0.109]   | [0.160]  |
| Constant                        | -0.530** | -0.406  | -1.218** | -0.754***     | -0.54    | -1.427** | -        | -0.926* | -1.724** | -0.896*** | -0.679* | 0.698   | -0.924** | -0.621+   | -0.295   | -0.931** | -0.916*   | -0.125   |
|                                 | [0.163]  | [0.339] | [0.457]  | [0.185]       | [0.392]  | [0.525]  | 1.012*** | [0.442] | [0.592]  | [0.243]   | [0.309] | [0.432] | [0.294]  | [0.377]   | [0.546]  | [0.314]  | [0.412]   | [0.592]  |
| LR chi2                         |          | 100.34  |          |               | 174.58   |          |          | 211.93  |          |           | 178.66  |         |          | 270.91    |          |          | 282.5     |          |
| Observations                    |          | 932     |          |               | 932      |          |          | 912     |          |           | 723     |         |          | 723       |          |          | 686       |          |

**Supplementary Table 5a | Econometric analysis of Aggregate Donations (AD).** We fit multivariate Tobit models to estimate *AD* for each of the three charities. *AD* is the overall amount of donations to each charity, combining both the extensive margin (which charity is chosen) and the intensive margin (Conditional Donations to each charity). Variables are defined in Supplementary Table 1. Standard errors are in brackets. \*\*\* p<0.001, \*\* p<0.01, \* p<0.05, + p<0.10.

| United States & Italy       |                     |                      |                      |                     |                      |                      |                     |                      |                     |                      |                      |                      |
|-----------------------------|---------------------|----------------------|----------------------|---------------------|----------------------|----------------------|---------------------|----------------------|---------------------|----------------------|----------------------|----------------------|
| DEP VAR: <i>AD</i>          | Model 1             |                      |                      | Model 2             |                      |                      | Model 3             |                      |                     | Model 4              |                      |                      |
|                             | State/Region<br>(1) | Country<br>(2)       | World<br>(3)         | State/Region<br>(4) | Country<br>(5)       | World<br>(6)         | State/Region<br>(7) | Country<br>(8)       | World<br>(9)        | State/Region<br>(10) | Country<br>(11)      | World<br>(12)        |
| Age                         | 0.009***<br>[0.002] | -0.011***<br>[0.003] | 0.00<br>[0.004]      | 0.008***<br>[0.002] | -0.011***<br>[0.003] | 0.003<br>[0.004]     | 0.008***<br>[0.002] | -0.011***<br>[0.003] | 0.003<br>[0.004]    | 0.008***<br>[0.002]  | -0.011***<br>[0.003] | 0.003<br>[0.004]     |
| Female                      | 0.138***<br>[0.040] | 0.088<br>[0.065]     | -0.039<br>[0.091]    | 0.150***<br>[0.039] | 0.072<br>[0.065]     | -0.062<br>[0.090]    | 0.153***<br>[0.039] | 0.072<br>[0.064]     | -0.049<br>[0.088]   | 0.136***<br>[0.040]  | 0.088<br>[0.066]     | -0.031<br>[0.091]    |
| Education Level             | 0.003<br>[0.017]    | -0.033<br>[0.029]    | 0.032<br>[0.039]     | 0.007<br>[0.017]    | -0.039<br>[0.028]    | 0.024<br>[0.038]     | 0.009<br>[0.017]    | -0.04<br>[0.028]     | 0.025<br>[0.038]    | -0.003<br>[0.018]    | -0.031<br>[0.031]    | 0.021<br>[0.041]     |
| Small/Medium Metro Area     | 0.028<br>[0.047]    | -0.073<br>[0.077]    | 0.07<br>[0.107]      | 0.026<br>[0.046]    | -0.089<br>[0.076]    | 0.097<br>[0.106]     | 0.029<br>[0.046]    | -0.093<br>[0.076]    | 0.084<br>[0.104]    | 0.033<br>[0.047]     | -0.089<br>[0.077]    | 0.113<br>[0.107]     |
| Large Metropolitan Area     | -0.047<br>[0.061]   | 0.14<br>[0.094]      | -0.164<br>[0.141]    | -0.054<br>[0.060]   | 0.103<br>[0.094]     | -0.12<br>[0.138]     | -0.049<br>[0.060]   | 0.094<br>[0.094]     | -0.106<br>[0.136]   | -0.033<br>[0.061]    | 0.096<br>[0.097]     | -0.073<br>[0.141]    |
| Rooted                      | -0.018<br>[0.051]   | 0.211*<br>[0.089]    | -0.332**<br>[0.111]  | -0.015<br>[0.050]   | 0.179*<br>[0.088]    | -0.334**<br>[0.108]  | -0.013<br>[0.050]   | 0.178*<br>[0.088]    | -0.326**<br>[0.106] | 0.001<br>[0.051]     | 0.128<br>[0.089]     | -0.349**<br>[0.109]  |
| Conservative scale          | 0.001<br>[0.019]    | -0.079*<br>[0.032]   | -0.363***<br>[0.052] | -0.01<br>[0.020]    | -0.106**<br>[0.035]  | -0.282***<br>[0.052] | -0.043+<br>[0.025]  | -0.107*<br>[0.047]   | -0.131*<br>[0.064]  | -0.009<br>[0.020]    | -0.089*<br>[0.036]   | -0.284***<br>[0.053] |
| Income                      | 0.020+<br>[0.010]   | 0.028+<br>[0.016]    | -0.021<br>[0.023]    | 0.013<br>[0.010]    | 0.031+<br>[0.016]    | -0.007<br>[0.022]    | 0.012<br>[0.010]    | 0.029+<br>[0.016]    | -0.002<br>[0.022]   | 0.007<br>[0.010]     | 0.031+<br>[0.017]    | -0.005<br>[0.023]    |
| Income Lost                 | -0.044<br>[0.041]   | 0.101<br>[0.067]     | -0.007<br>[0.094]    | -0.039<br>[0.041]   | 0.077<br>[0.067]     | -0.023<br>[0.093]    | -0.041<br>[0.041]   | 0.078<br>[0.067]     | -0.008<br>[0.091]   | -0.044<br>[0.041]    | 0.085<br>[0.068]     | -0.018<br>[0.094]    |
| Priming State/Region        | 0.051<br>[0.055]    | -0.042<br>[0.089]    | -0.114<br>[0.133]    | 0.056<br>[0.055]    | -0.069<br>[0.089]    | -0.117<br>[0.131]    | 0.055<br>[0.055]    | -0.072<br>[0.089]    | -0.111<br>[0.129]   | 0.083<br>[0.055]     | -0.073<br>[0.090]    | -0.137<br>[0.133]    |
| Priming Country             | -0.006<br>[0.056]   | -0.059<br>[0.090]    | -0.01<br>[0.131]     | -0.002<br>[0.055]   | -0.074<br>[0.089]    | -0.002<br>[0.128]    | -0.006<br>[0.055]   | -0.074<br>[0.089]    | -0.014<br>[0.126]   | 0.013<br>[0.056]     | -0.092<br>[0.092]    | 0.007<br>[0.130]     |
| Priming World               | 0.007<br>[0.055]    | -0.179*<br>[0.091]   | 0.287*<br>[0.123]    | 0.008<br>[0.054]    | -0.194*<br>[0.090]   | 0.295*<br>[0.121]    | 0.007<br>[0.054]    | -0.195*<br>[0.090]   | 0.288*<br>[0.119]   | 0.037<br>[0.054]     | -0.203*<br>[0.092]   | 0.309*<br>[0.122]    |
| County-level COVID Exposure | -0.001<br>[0.003]   | 0.001<br>[0.005]     | 0.011<br>[0.007]     | -0.001<br>[0.003]   | 0.001<br>[0.005]     | 0.012<br>[0.007]     | 0.000<br>[0.003]    | 0.001<br>[0.005]     | 0.012+<br>[0.007]   | -0.002<br>[0.003]    | 0.001<br>[0.005]     | 0.012+<br>[0.007]    |
| Personal COVID Exposure     | 0.091*<br>[0.041]   | -0.042<br>[0.066]    | 0.175+<br>[0.092]    | 0.072+<br>[0.040]   | -0.022<br>[0.066]    | 0.139<br>[0.092]     | 0.082<br>[0.053]    | 0.026<br>[0.097]     | 0.066<br>[0.130]    | 0.070+<br>[0.041]    | -0.041<br>[0.068]    | 0.133<br>[0.093]     |
| Italy                       | -0.039<br>[0.049]   | 0.392***<br>[0.079]  | 0.487***<br>[0.114]  | -0.031<br>[0.054]   | 0.316***<br>[0.086]  | 0.312*<br>[0.123]    | -0.016<br>[0.236]   | 0.453<br>[0.375]     | 0.727<br>[0.531]    | 0.002<br>[0.058]     | 0.275**<br>[0.094]   | 0.315*<br>[0.134]    |
| Local Social Identity       |                     |                      |                      | 0.245***<br>[0.029] | -0.239***<br>[0.051] | -0.225**<br>[0.070]  | 0.222***<br>[0.037] | -0.200**<br>[0.069]  | -0.244**<br>[0.093] | 0.197***<br>[0.033]  | -0.233***<br>[0.058] | -0.260***<br>[0.079] |
| National Social Identity    |                     |                      |                      | -0.075*<br>[0.031]  | 0.253***<br>[0.054]  | -0.084<br>[0.073]    | -0.026<br>[0.041]   | 0.174*<br>[0.076]    | -0.034<br>[0.101]   | -0.069*<br>[0.035]   | 0.303***<br>[0.061]  | -0.118<br>[0.082]    |

| (Continued)                     | United States & Italy |          |         |           |         |          |           |         |           |           |          |          |
|---------------------------------|-----------------------|----------|---------|-----------|---------|----------|-----------|---------|-----------|-----------|----------|----------|
|                                 | (1)                   | (2)      | (3)     | (4)       | (5)     | (6)      | (7)       | (8)     | (9)       | (10)      | (11)     | (12)     |
| Global Social Identity          |                       |          |         | -0.061*   | 0.025   | 0.374*** | -0.051    | 0.092   | 0.282***  | -0.073*   | 0.009    | 0.346*** |
|                                 |                       |          |         | [0.028]   | [0.045] | [0.066]  | [0.035]   | [0.061] | [0.082]   | [0.030]   | [0.049]  | [0.071]  |
| Trust People from State/Region  |                       |          |         |           |         |          |           |         |           | 0.029     | -0.05    | 0.157+   |
|                                 |                       |          |         |           |         |          |           |         |           | [0.035]   | [0.058]  | [0.083]  |
| Trust People from Country       |                       |          |         |           |         |          |           |         |           | -0.046    | -0.064   | 0.059    |
|                                 |                       |          |         |           |         |          |           |         |           | [0.033]   | [0.054]  | [0.076]  |
| Trust People from Other Country |                       |          |         |           |         |          |           |         |           | 0.007     | 0.126*   | 0.057    |
|                                 |                       |          |         |           |         |          |           |         |           | [0.031]   | [0.051]  | [0.073]  |
| Trust Local Community           |                       |          |         |           |         |          |           |         |           | 0.070*    | 0.068    | -0.115   |
|                                 |                       |          |         |           |         |          |           |         |           | [0.033]   | [0.055]  | [0.076]  |
| PSYC Vulnerability              |                       |          |         |           |         |          |           |         |           | 0.064     | -0.033   | -0.2     |
|                                 |                       |          |         |           |         |          |           |         |           | [0.057]   | [0.098]  | [0.134]  |
| Social Relationships Loss       |                       |          |         |           |         |          |           |         |           | 0.104     | -0.151   | 0.011    |
|                                 |                       |          |         |           |         |          |           |         |           | [0.083]   | [0.140]  | [0.194]  |
| Employees/self-employed         |                       |          |         |           |         |          |           |         |           | 0.064     | -0.046   | -0.012   |
|                                 |                       |          |         |           |         |          |           |         |           | [0.053]   | [0.087]  | [0.121]  |
| Professionals/Managers          |                       |          |         |           |         |          |           |         |           | 0.06      | -0.057   | -0.003   |
|                                 |                       |          |         |           |         |          |           |         |           | [0.053]   | [0.085]  | [0.121]  |
| Conservative X Ita              |                       |          |         |           |         |          | 0.084*    | 0.027   | -0.386*** |           |          |          |
|                                 |                       |          |         |           |         |          | [0.042]   | [0.069] | [0.104]   |           |          |          |
| Personal Exposure X Ita         |                       |          |         |           |         |          | -0.025    | -0.094  | 0.123     |           |          |          |
|                                 |                       |          |         |           |         |          | [0.080]   | [0.131] | [0.180]   |           |          |          |
| Local Social Identity X Ita     |                       |          |         |           |         |          | 0.049     | -0.103  | 0.107     |           |          |          |
|                                 |                       |          |         |           |         |          | [0.061]   | [0.101] | [0.137]   |           |          |          |
| National Social Identity X Ita  |                       |          |         |           |         |          | [0.061]   | -0.092  | 0.185+    | -0.203    |          |          |
|                                 |                       |          |         |           |         |          | [0.064]   | [0.107] | [0.144]   |           |          |          |
| Global Social Identity X Ita    |                       |          |         |           |         |          | [0.064]   | -0.032  | -0.154+   | 0.222+    |          |          |
|                                 |                       |          |         |           |         |          | [0.056]   | [0.089] | [0.130]   |           |          |          |
| Constant                        | -0.691***             | -0.595** | -0.538+ | -0.870*** | -0.594* | -0.991** | -0.877*** | -0.641* | -1.149**  | -1.029*** | -0.817** | -1.113** |
|                                 | [0.132]               | [0.211]  | [0.295] | [0.151]   | [0.248] | [0.347]  | [0.168]   | [0.287] | [0.395]   | [0.168]   | [0.279]  | [0.391]  |
| LR chi2                         |                       | 288      |         |           | 447.01  |          |           | 488.17  |           |           | 469.34   |          |
| Observations                    |                       | 1,655    |         |           | 1,655   |          |           | 1,655   |           |           | 1,598    |          |

**Supplementary Table 5b | Econometric analysis of Aggregate Donations (AD) - Pooled observations.** We apply the same multivariate Tobit specification used in Supplementary Table 5a to the pooled dataset of U.S. and Italy observations. The “X” operator indicates an interaction term of the two variables it separates. See notes to Supplementary Table 5a and Supplementary Table 1 for variables’ definition. \*\*\* p<0.001, \*\* p<0.01, \* p<0.05, + p<0.10

| DEP VAR: $P$               | United States |                |              |              |                |              |              |                |              | Italy          |                 |               |                |                 |               |                |                 |               |
|----------------------------|---------------|----------------|--------------|--------------|----------------|--------------|--------------|----------------|--------------|----------------|-----------------|---------------|----------------|-----------------|---------------|----------------|-----------------|---------------|
|                            | Model 1       |                |              | Model 2      |                |              | Model 3      |                |              | Model 1        |                 |               | Model 2        |                 |               | Model 3        |                 |               |
|                            | State<br>(1)  | Country<br>(2) | World<br>(3) | State<br>(4) | Country<br>(5) | World<br>(6) | State<br>(7) | Country<br>(8) | World<br>(9) | Region<br>(10) | Country<br>(11) | World<br>(12) | Region<br>(13) | Country<br>(14) | World<br>(15) | Region<br>(16) | Country<br>(17) | World<br>(18) |
| Age                        | 0.020**<br>*  | -0.004         | 0.01         | 0.019***     | -0.005         | 0.008        | 0.020***     | -0.004         | 0.01         | 0.013+         | -0.013          | 0.002         | 0.011          | -0.012          | 0.003         | 0.012          | -0.011          | 0.005         |
|                            | [0.005]       | [0.007]        | [0.007]      | [0.005]      | [0.007]        | [0.007]      | [0.006]      | [0.007]        | [0.008]      | [0.008]        | [0.008]         | [0.009]       | [0.008]        | [0.008]         | [0.010]       | [0.008]        | [0.009]         | [0.010]       |
| Female                     | 0.390**       | 0.347*         | 0.287+       | 0.407**      | 0.344*         | 0.276        | 0.394**      | 0.412**        | 0.355*       | 0.280+         | 0.231           | -0.013        | 0.294+         | 0.184           | -0.062        | 0.347*         | 0.226           | -0.015        |
|                            | [0.126]       | [0.153]        | [0.166]      | [0.128]      | [0.154]        | [0.169]      | [0.132]      | [0.160]        | [0.174]      | [0.158]        | [0.164]         | [0.184]       | [0.161]        | [0.167]         | [0.189]       | [0.170]        | [0.177]         | [0.200]       |
| Education Level            | -0.028        | -0.118+        | -0.008       | -0.034       | -0.120+        | -0.01        | -0.041       | -0.102         | -0.011       | 0.006          | 0.039           | 0.026         | 0.039          | 0.014           | 0.031         | 0.007          | -0.011          | -0.013        |
|                            | [0.053]       | [0.063]        | [0.069]      | [0.054]      | [0.064]        | [0.070]      | [0.061]      | [0.072]        | [0.081]      | [0.072]        | [0.075]         | [0.082]       | [0.074]        | [0.077]         | [0.085]       | [0.079]        | [0.082]         | [0.091]       |
| Small/Medium<br>Metro Area | 0.187         | 0.029          | 0.244        | 0.171        | 0.01           | 0.277        | 0.204        | 0.083          | 0.302        | -0.19          | -0.362*         | -0.209        | -0.185         | -0.404*         | -0.17         | -0.199         | -0.436*         | -0.157        |
|                            | [0.166]       | [0.202]        | [0.227]      | [0.169]      | [0.204]        | [0.233]      | [0.172]      | [0.211]        | [0.238]      | [0.171]        | [0.180]         | [0.199]       | [0.174]        | [0.184]         | [0.206]       | [0.182]        | [0.192]         | [0.215]       |
| Large<br>Metropolitan Area | 0.013         | -0.04          | -0.027       | -0.057       | -0.089         | -0.001       | -0.03        | -0.04          | -0.025       | -0.28          | -0.006          | -0.352        | -0.249         | -0.096          | -0.343        | -0.164         | -0.037          | -0.129        |
|                            | [0.204]       | [0.248]        | [0.278]      | [0.207]      | [0.252]        | [0.285]      | [0.212]      | [0.261]        | [0.291]      | [0.243]        | [0.241]         | [0.281]       | [0.247]        | [0.246]         | [0.290]       | [0.264]        | [0.263]         | [0.309]       |
| Rooted                     | -0.076        | -0.05          | -0.383*      | -0.11        | -0.091         | -0.415*      | -0.181       | -0.244         | -0.531**     | -0.093         | 0.582*          | -0.406        | -0.088         | 0.580*          | -0.392        | -0.024         | 0.597*          | -0.417        |
|                            | [0.148]       | [0.177]        | [0.182]      | [0.150]      | [0.179]        | [0.185]      | [0.157]      | [0.185]        | [0.192]      | [0.246]        | [0.284]         | [0.270]       | [0.249]        | [0.287]         | [0.275]       | [0.257]        | [0.295]         | [0.283]       |
| Midwest                    | -0.095        | -0.093         | 0.09         | 0.009        | -0.082         | 0.048        | -0.041       | -0.167         | -0.053       |                |                 |               |                |                 |               |                |                 |               |
|                            | [0.179]       | [0.225]        | [0.239]      | [0.182]      | [0.228]        | [0.245]      | [0.186]      | [0.234]        | [0.251]      |                |                 |               |                |                 |               |                |                 |               |
| South                      | -0.350+       | 0.111          | -0.034       | -0.325+      | 0.08           | -0.101       | -0.344+      | 0.013          | -0.12        |                |                 |               |                |                 |               |                |                 |               |
|                            | [0.182]       | [0.218]        | [0.241]      | [0.185]      | [0.220]        | [0.246]      | [0.189]      | [0.226]        | [0.252]      |                |                 |               |                |                 |               |                |                 |               |
| West                       | -0.206        | 0.003          | 0.05         | -0.218       | 0.033          | 0.067        | -0.273       | -0.018         | 0.039        |                |                 |               |                |                 |               |                |                 |               |
|                            | [0.181]       | [0.223]        | [0.241]      | [0.184]      | [0.225]        | [0.245]      | [0.190]      | [0.232]        | [0.253]      |                |                 |               |                |                 |               |                |                 |               |
| South Italy                |               |                |              |              |                |              |              |                |              | 0.04           | 0.22            | 0.068         | 0.021          | 0.205           | 0.047         | 0.047          | 0.276           | 0.048         |
|                            |               |                |              |              |                |              |              |                |              | [0.173]        | [0.179]         | [0.198]       | [0.176]        | [0.182]         | [0.203]       | [0.189]        | [0.196]         | [0.218]       |
| Conservative scale         | -0.154**      | -0.22**        | -0.30***     | -0.173**     | -0.25**        | -0.26**      | -0.125+      | -0.199*        | -0.213*      | -0.17+         | -0.33***        | -0.97***      | -0.209*        | -0.34***        | -0.89***      | -0.235*        | -0.33**         | -0.92***      |
|                            | [0.054]       | [0.067]        | [0.075]      | [0.062]      | [0.077]        | [0.086]      | [0.067]      | [0.082]        | [0.091]      | [0.087]        | [0.093]         | [0.117]       | [0.092]        | [0.098]         | [0.122]       | [0.096]        | [0.103]         | [0.127]       |
| Income                     | 0.055+        | 0.038          | 0.03         | 0.039        | 0.035          | 0.036        | 0.031        | 0.035          | 0.02         | 0.026          | 0.07            | -0.019        | 0.007          | 0.073+          | 0.002         | -0.007         | 0.063           | -0.001        |
|                            | [0.032]       | [0.037]        | [0.040]      | [0.032]      | [0.038]        | [0.041]      | [0.034]      | [0.040]        | [0.044]      | [0.042]        | [0.043]         | [0.048]       | [0.043]        | [0.044]         | [0.050]       | [0.045]        | [0.046]         | [0.052]       |
| Income Lost                | -0.134        | 0.032          | 0.026        | -0.15        | 0.008          | 0.029        | -0.189       | -0.018         | 0.014        | 0.147          | 0.28            | 0.084         | 0.147          | 0.255           | 0.063         | 0.132          | 0.27            | 0.078         |
|                            | [0.129]       | [0.155]        | [0.167]      | [0.132]      | [0.157]        | [0.171]      | [0.137]      | [0.163]        | [0.177]      | [0.171]        | [0.178]         | [0.199]       | [0.175]        | [0.181]         | [0.203]       | [0.182]        | [0.189]         | [0.212]       |
| Priming<br>State/Region    | -0.010        | -0.104         | -0.088       | -0.01        | -0.1           | -0.051       | 0.065        | -0.09          | -0.042       | 0.343          | 0.069           | 0.058         | 0.424+         | 0.024           | 0.048         | 0.485*         | 0.052           | 0.032         |
|                            | [0.179]       | [0.217]        | [0.241]      | [0.182]      | [0.220]        | [0.247]      | [0.187]      | [0.228]        | [0.255]      | [0.221]        | [0.225]         | [0.263]       | [0.225]        | [0.229]         | [0.270]       | [0.234]        | [0.239]         | [0.285]       |
| Priming Country            | -0.261        | -0.206         | -0.241       | -0.252       | -0.212         | -0.193       | -0.206       | -0.185         | -0.161       | 0.124          | -0.058          | 0.118         | 0.162          | -0.06           | 0.09          | 0.126          | -0.122          | 0.083         |
|                            | [0.177]       | [0.212]        | [0.238]      | [0.179]      | [0.215]        | [0.243]      | [0.184]      | [0.222]        | [0.249]      | [0.222]        | [0.226]         | [0.260]       | [0.225]        | [0.229]         | [0.266]       | [0.236]        | [0.241]         | [0.280]       |
| Priming World              | -0.085        | -0.134         | 0.211        | -0.081       | -0.114         | 0.273        | -0.011       | -0.085         | 0.32         | 0.252          | -0.236          | 0.490*        | 0.279          | -0.272          | 0.493+        | 0.364          | -0.229          | 0.583*        |
|                            | [0.174]       | [0.211]        | [0.224]      | [0.177]      | [0.213]        | [0.229]      | [0.182]      | [0.218]        | [0.235]      | [0.219]        | [0.229]         | [0.249]       | [0.221]        | [0.233]         | [0.255]       | [0.231]        | [0.244]         | [0.268]       |

| <i>(Continued)</i>              | United States |         |         |          |         |          |           |         |         | Italy   |         |         |         |         |          |         |         |          |
|---------------------------------|---------------|---------|---------|----------|---------|----------|-----------|---------|---------|---------|---------|---------|---------|---------|----------|---------|---------|----------|
|                                 | (1)           | (2)     | (3)     | (4)      | (5)     | (6)      | (7)       | (8)     | (9)     | (10)    | (11)    | (12)    | (13)    | (14)    | (15)     | (16)    | (17)    | (18)     |
| County-level COVID Exposure     | 0.002         | -0.009  | 0.003   | 0.002    | -0.007  | 0.004    | 0         | -0.012  | 0       | 0.006   | 0.018+  | 0.02    | 0.008   | 0.016   | 0.022+   | 0.006   | 0.015   | 0.023+   |
|                                 | [0.011]       | [0.013] | [0.016] | [0.012]  | [0.013] | [0.016]  | [0.012]   | [0.013] | [0.016] | [0.009] | [0.010] | [0.012] | [0.010] | [0.010] | [0.013]  | [0.010] | [0.011] | [0.013]  |
| Personal COVID Exposure         | 0.273*        | 0.23    | 0.271   | 0.192    | 0.17    | 0.179    | 0.188     | 0.101   | 0.156   | 0.246   | 0.067   | 0.422*  | 0.203   | 0.076   | 0.362+   | 0.226   | 0.095   | 0.357+   |
|                                 | [0.133]       | [0.160] | [0.172] | [0.137]  | [0.164] | [0.178]  | [0.142]   | [0.171] | [0.185] | [0.161] | [0.167] | [0.188] | [0.165] | [0.171] | [0.195]  | [0.173] | [0.180] | [0.204]  |
| Local Social Identity           |               |         |         | 0.512*** | -0.068  | -0.09    | 0.349**   | -0.15   | -0.215  |         |         |         | 0.486** | -0.324* | -0.108   | 0.488** | -0.388* | -0.206   |
|                                 |               |         |         | [0.094]  | [0.115] | [0.128]  | [0.107]   | [0.132] | [0.144] |         |         |         | [0.130] | [0.138] | [0.157]  | [0.154] | [0.163] | [0.185]  |
| National Social Identity        |               |         |         | -0.038   | 0.232+  | -0.011   | -0.008    | 0.336*  | -0.035  |         |         |         | -0.15   | 0.444** | -0.225   | -0.17   | 0.514** | -0.251   |
|                                 |               |         |         | [0.101]  | [0.124] | [0.136]  | [0.112]   | [0.139] | [0.153] |         |         |         | [0.132] | [0.141] | [0.157]  | [0.156] | [0.166] | [0.184]  |
| Global Social Identity          |               |         |         | 0.028    | 0.206*  | 0.405*** | -0.049    | 0.118   | 0.334** |         |         |         | -0.028  | 0.064   | 0.672*** | -0.081  | 0.029   | 0.611*** |
|                                 |               |         |         | [0.087]  | [0.101] | [0.110]  | [0.096]   | [0.110] | [0.119] |         |         |         | [0.115] | [0.121] | [0.146]  | [0.133] | [0.140] | [0.169]  |
| Trust People from State/Region  |               |         |         |          |         |          | 0.221+    | -0.078  | 0.218   |         |         |         |         |         |          | -0.009  | 0.073   | 0.290+   |
|                                 |               |         |         |          |         |          | [0.121]   | [0.145] | [0.163] |         |         |         |         |         |          | [0.145] | [0.149] | [0.172]  |
| Trust People from Country       |               |         |         |          |         |          | -0.194+   | -0.247+ | -0.108  |         |         |         |         |         |          | -0.008  | -0.036  | 0.082    |
|                                 |               |         |         |          |         |          | [0.109]   | [0.132] | [0.146] |         |         |         |         |         |          | [0.143] | [0.149] | [0.167]  |
| Trust People from Other Country |               |         |         |          |         |          | 0.134     | 0.391** | 0.247+  |         |         |         |         |         |          | 0.08    | 0.207   | 0.133    |
|                                 |               |         |         |          |         |          | [0.100]   | [0.122] | [0.135] |         |         |         |         |         |          | [0.131] | [0.137] | [0.162]  |
| Trust Local Community           |               |         |         |          |         |          | 0.161     | 0.257+  | 0.075   |         |         |         |         |         |          | 0.005   | 0.023   | -0.239   |
|                                 |               |         |         |          |         |          | [0.109]   | [0.132] | [0.146] |         |         |         |         |         |          | [0.139] | [0.146] | [0.165]  |
| PSYC Vulnerability              |               |         |         |          |         |          | 0.242     | -0.001  | -0.02   |         |         |         |         |         |          | -0.238  | -0.453+ | -0.511   |
|                                 |               |         |         |          |         |          | [0.187]   | [0.229] | [0.245] |         |         |         |         |         |          | [0.256] | [0.273] | [0.311]  |
| Social Relationships Loss       |               |         |         |          |         |          | 0.033     | 0.074   | 0.05    |         |         |         |         |         |          | 0.647+  | -0.164  | 0.172    |
|                                 |               |         |         |          |         |          | [0.257]   | [0.308] | [0.339] |         |         |         |         |         |          | [0.383] | [0.404] | [0.454]  |
| Employees/self-employed         |               |         |         |          |         |          | 0.013     | -0.265  | -0.172  |         |         |         |         |         |          | 0.309   | 0.14    | 0.225    |
|                                 |               |         |         |          |         |          | [0.183]   | [0.223] | [0.247] |         |         |         |         |         |          | [0.211] | [0.221] | [0.251]  |
| Professionals/Managers          |               |         |         |          |         |          | -0.028    | -0.207  | -0.02   |         |         |         |         |         |          | 0.14    | 0.112   | 0.062    |
|                                 |               |         |         |          |         |          | [0.180]   | [0.210] | [0.241] |         |         |         |         |         |          | [0.223] | [0.228] | [0.256]  |
| Constant                        | -0.477        | 0.056   | -0.704  | -1.455** | -0.658  | -1.589*  | -2.139*** | -1.477* | -       | -0.165  | 0.083   | 1.988** | -0.798  | -0.449  | 0.448    | -1.135  | -1.16   | 0.285    |
|                                 | [0.414]       | [0.484] | [0.539] | [0.486]  | [0.568] | [0.638]  | [0.548]   | [0.649] | [0.728] | [0.560] | [0.599] | [0.652] | [0.704] | [0.752] | [0.840]  | [0.763] | [0.825] | [0.928]  |
| LR chi2                         |               | 95.58   |         |          | 155.33  |          |           | 187.33  |         |         | 145.93  |         |         | 202.62  |          |         | 212.3   |          |
| Observations                    |               | 932     |         |          | 932     |          |           | 912     |         |         | 723     |         |         | 723     |          |         | 686     |          |

**Supplementary Table 5c | Econometric analysis of Charity Choice.** Estimates of marginal effects from multivariate Probit model are reported. Standard errors are in brackets. See notes to Supplementary Table 5a and Supplementary Table 1 for variables’ definition. \*\*\* p<0.001, \*\* p<0.01, \* p<0.05, + p<0.10.

| United States & Italy       |                      |                      |                      |                      |                      |                      |                     |                     |                     |                      |                      |                      |
|-----------------------------|----------------------|----------------------|----------------------|----------------------|----------------------|----------------------|---------------------|---------------------|---------------------|----------------------|----------------------|----------------------|
| DEP VAR: <i>P</i>           | Model 1              |                      |                      | Model 2              |                      |                      | Model 3             |                     |                     | Model 4              |                      |                      |
|                             | State/Region<br>(1)  | Country<br>(2)       | World<br>(3)         | State/Region<br>(4)  | Country<br>(5)       | World<br>(6)         | State/Region<br>(7) | Country<br>(8)      | World<br>(9)        | State/Region<br>(10) | Country<br>(11)      | World<br>(12)        |
| Age                         | 0.017***<br>[0.004]  | -0.008<br>[0.005]    | 0.01<br>[0.005]      | 0.016***<br>[0.004]  | -0.008+<br>[0.005]   | 0.007<br>[0.006]     | 0.016***<br>[0.004] | -0.008<br>[0.005]   | 0.006<br>[0.006]    | 0.017***<br>[0.004]  | -0.008<br>[0.005]    | 0.007<br>[0.006]     |
| Female                      | 0.346***<br>[0.097]  | 0.302**<br>[0.109]   | 0.142<br>[0.120]     | 0.356***<br>[0.099]  | 0.271*<br>[0.111]    | 0.106<br>[0.123]     | 0.366***<br>[0.099] | 0.276*<br>[0.112]   | 0.121<br>[0.124]    | 0.349***<br>[0.102]  | 0.299**<br>[0.114]   | 0.144<br>[0.126]     |
| Education Level             | -0.011<br>[0.042]    | -0.051<br>[0.048]    | 0.013<br>[0.052]     | -0.003<br>[0.043]    | -0.062<br>[0.048]    | 0.007<br>[0.053]     | -0.004<br>[0.043]   | -0.068<br>[0.048]   | 0.003<br>[0.053]    | -0.019<br>[0.047]    | -0.058<br>[0.053]    | 0.001<br>[0.058]     |
| Small/Medium Metro Area     | -0.021<br>[0.116]    | -0.149<br>[0.129]    | 0.012<br>[0.143]     | -0.022<br>[0.118]    | -0.174<br>[0.131]    | 0.04<br>[0.146]      | -0.021<br>[0.118]   | -0.185<br>[0.131]   | 0.024<br>[0.148]    | -0.009<br>[0.120]    | -0.173<br>[0.134]    | 0.057<br>[0.150]     |
| Large Metropolitan Area     | -0.151<br>[0.149]    | 0.03<br>[0.162]      | -0.249<br>[0.185]    | -0.187<br>[0.151]    | -0.04<br>[0.165]     | -0.235<br>[0.189]    | -0.188<br>[0.152]   | -0.06<br>[0.166]    | -0.236<br>[0.192]   | -0.147<br>[0.156]    | -0.032<br>[0.171]    | -0.177<br>[0.195]    |
| Rooted                      | -0.080<br>[0.124]    | 0.178<br>[0.146]     | -0.379**<br>[0.147]  | -0.083<br>[0.126]    | 0.137<br>[0.147]     | -0.400**<br>[0.150]  | -0.093<br>[0.126]   | 0.128<br>[0.148]    | -0.418**<br>[0.151] | -0.097<br>[0.130]    | 0.043<br>[0.151]     | -0.455**<br>[0.154]  |
| Conservative scale          | -0.155***<br>[0.046] | -0.251***<br>[0.053] | -0.536***<br>[0.063] | -0.170***<br>[0.050] | -0.284***<br>[0.058] | -0.473***<br>[0.068] | -0.172**<br>[0.062] | -0.244**<br>[0.076] | -0.271**<br>[0.085] | -0.161**<br>[0.052]  | -0.256***<br>[0.061] | -0.467***<br>[0.070] |
| Income                      | 0.047+<br>[0.025]    | 0.055*<br>[0.027]    | 0.009<br>[0.030]     | 0.032<br>[0.025]     | 0.056*<br>[0.028]    | 0.02<br>[0.031]      | 0.031<br>[0.025]    | 0.054+<br>[0.028]   | 0.023<br>[0.031]    | 0.018<br>[0.026]     | 0.048+<br>[0.029]    | 0.012<br>[0.032]     |
| Income Lost                 | -0.032<br>[0.101]    | 0.135<br>[0.114]     | 0.031<br>[0.125]     | -0.037<br>[0.103]    | 0.106<br>[0.115]     | 0.011<br>[0.128]     | -0.041<br>[0.103]   | 0.104<br>[0.116]    | 0.022<br>[0.128]    | -0.066<br>[0.106]    | 0.095<br>[0.119]     | -0.003<br>[0.131]    |
| Priming State/Region        | 0.132<br>[0.138]     | -0.011<br>[0.153]    | -0.043<br>[0.174]    | 0.168<br>[0.140]     | -0.027<br>[0.155]    | -0.023<br>[0.179]    | 0.165<br>[0.140]    | -0.036<br>[0.156]   | -0.026<br>[0.181]   | 0.242+<br>[0.144]    | 0.002<br>[0.160]     | -0.008<br>[0.184]    |
| Priming Country             | -0.109<br>[0.137]    | -0.148<br>[0.152]    | -0.09<br>[0.171]     | -0.086<br>[0.139]    | -0.151<br>[0.154]    | -0.063<br>[0.174]    | -0.088<br>[0.139]   | -0.149<br>[0.154]   | -0.08<br>[0.177]    | -0.057<br>[0.142]    | -0.161<br>[0.158]    | -0.042<br>[0.179]    |
| Priming World               | 0.046<br>[0.135]     | -0.172<br>[0.153]    | 0.317+<br>[0.164]    | 0.061<br>[0.137]     | -0.18<br>[0.155]     | 0.360*<br>[0.167]    | 0.06<br>[0.137]     | -0.186<br>[0.155]   | 0.364*<br>[0.169]   | 0.141<br>[0.140]     | -0.138<br>[0.159]    | 0.434*<br>[0.171]    |
| County-level COVID Exposure | 0.005<br>[0.007]     | 0.008<br>[0.008]     | 0.014<br>[0.009]     | 0.007<br>[0.007]     | 0.008<br>[0.008]     | 0.015+<br>[0.009]    | 0.007<br>[0.007]    | 0.007<br>[0.008]    | 0.016+<br>[0.010]   | 0.004<br>[0.007]     | 0.007<br>[0.008]     | 0.015<br>[0.009]     |
| Personal COVID Exposure     | 0.269**<br>[0.101]   | 0.11<br>[0.112]      | 0.350**<br>[0.122]   | 0.207*<br>[0.103]    | 0.088<br>[0.115]     | 0.274*<br>[0.126]    | 0.209<br>[0.135]    | 0.118<br>[0.161]    | 0.187<br>[0.175]    | 0.201+<br>[0.106]    | 0.062<br>[0.119]     | 0.264*<br>[0.131]    |
| Italy                       | 0.303*<br>[0.120]    | 0.825***<br>[0.132]  | 0.827***<br>[0.147]  | 0.171<br>[0.135]     | 0.608***<br>[0.146]  | 0.529**<br>[0.165]   | 0.861<br>[0.602]    | 1.338*<br>[0.654]   | 1.731*<br>[0.747]   | 0.227<br>[0.147]     | 0.587***<br>[0.161]  | 0.556**<br>[0.182]   |
| Local Social Identity       |                      |                      |                      | 0.478***<br>[0.074]  | -0.203*<br>[0.086]   | -0.125<br>[0.095]    | 0.502***<br>[0.093] | -0.086<br>[0.114]   | -0.079<br>[0.125]   | 0.361***<br>[0.085]  | -0.253*<br>[0.099]   | -0.222*<br>[0.109]   |
| National Social Identity    |                      |                      |                      | -0.09<br>[0.078]     | 0.341***<br>[0.089]  | -0.052<br>[0.098]    | -0.04<br>[0.100]    | 0.228+<br>[0.123]   | -0.004<br>[0.135]   | -0.053<br>[0.088]    | 0.438***<br>[0.102]  | -0.052<br>[0.112]    |

| (Continued)                     | United States & Italy |         |         |           |         |          |           |         |           |           |          |          |
|---------------------------------|-----------------------|---------|---------|-----------|---------|----------|-----------|---------|-----------|-----------|----------|----------|
|                                 | (1)                   | (2)     | (3)     | (4)       | (5)     | (6)      | (7)       | (8)     | (9)       | (10)      | (11)     | (12)     |
| Global Social Identity          |                       |         |         | 0.016     | 0.151*  | 0.501*** | 0.031     | 0.215*  | 0.406***  | -0.046    | 0.074    | 0.425*** |
|                                 |                       |         |         | [0.069]   | [0.076] | [0.086]  | [0.086]   | [0.100] | [0.109]   | [0.076]   | [0.084]  | [0.094]  |
| Trust People from State/Region  |                       |         |         |           |         |          |           |         |           | 0.124     | 0.009    | 0.250*   |
|                                 |                       |         |         |           |         |          |           |         |           | [0.090]   | [0.100]  | [0.114]  |
| Trust People from Country       |                       |         |         |           |         |          |           |         |           | -0.123    | -0.139   | -0.024   |
|                                 |                       |         |         |           |         |          |           |         |           | [0.084]   | [0.094]  | [0.105]  |
| Trust People from Other Country |                       |         |         |           |         |          |           |         |           | 0.117     | 0.302*** | 0.211*   |
|                                 |                       |         |         |           |         |          |           |         |           | [0.078]   | [0.088]  | [0.099]  |
| Trust Local Community           |                       |         |         |           |         |          |           |         |           | 0.099     | 0.099    | -0.097   |
|                                 |                       |         |         |           |         |          |           |         |           | [0.084]   | [0.094]  | [0.105]  |
| PSYC Vulnerability              |                       |         |         |           |         |          |           |         |           | 0.067     | -0.092   | -0.248   |
|                                 |                       |         |         |           |         |          |           |         |           | [0.147]   | [0.168]  | [0.185]  |
| Social Relationships Loss       |                       |         |         |           |         |          |           |         |           | 0.251     | -0.049   | 0.123    |
|                                 |                       |         |         |           |         |          |           |         |           | [0.208]   | [0.237]  | [0.264]  |
| Employees/self-employed         |                       |         |         |           |         |          |           |         |           | 0.111     | -0.073   | -0.042   |
|                                 |                       |         |         |           |         |          |           |         |           | [0.135]   | [0.151]  | [0.169]  |
| Professionals/Managers          |                       |         |         |           |         |          |           |         |           | 0.071     | -0.055   | -0.008   |
|                                 |                       |         |         |           |         |          |           |         |           | [0.135]   | [0.148]  | [0.167]  |
| Conservative X Ita              |                       |         |         |           |         |          | -0.035    | -0.109  | -0.592*** |           |          |          |
|                                 |                       |         |         |           |         |          | [0.108]   | [0.121] | [0.145]   |           |          |          |
| Personal Exposure X Ita         |                       |         |         |           |         |          | 0.001     | -0.046  | 0.179     |           |          |          |
|                                 |                       |         |         |           |         |          | [0.208]   | [0.230] | [0.256]   |           |          |          |
| Local Social Identity X Ita     |                       |         |         |           |         |          | -0.05     | -0.262  | -0.044    |           |          |          |
|                                 |                       |         |         |           |         |          | [0.158]   | [0.176] | [0.198]   |           |          |          |
| National Social Identity X Ita  |                       |         |         |           |         |          | -0.121    | 0.229   | -0.24     |           |          |          |
|                                 |                       |         |         |           |         |          | [0.164]   | [0.184] | [0.204]   |           |          |          |
| Global Social Identity X Ita    |                       |         |         |           |         |          | -0.048    | -0.154  | 0.265     |           |          |          |
|                                 |                       |         |         |           |         |          | [0.142]   | [0.155] | [0.181]   |           |          |          |
| Constant                        | -0.537+               | -0.163  | 0.093   | -1.363*** | -0.691+ | -0.926*  | -1.559*** | -0.899+ | -1.333*   | -1.862*** | -1.310** | -1.435** |
|                                 | [0.312]               | [0.347] | [0.382] | [0.371]   | [0.416] | [0.461]  | [0.411]   | [0.474] | [0.526]   | [0.415]   | [0.468]  | [0.524]  |
| LR chi2                         |                       | 266.84  |         |           | 381.31  |          |           | 416.21  |           |           | 398.31   |          |
| Observations                    |                       | 1,655   |         |           | 1,655   |          |           | 1,655   |           |           | 1,598    |          |

**Supplementary Table 5d | Econometric analysis of Charity Choice. Joint U.S. and Italy.** Estimates of marginal effects from multivariate Probit model are reported. See notes to Supplementary Table 5a and Supplementary Table 1 for variables’ definition. Standard errors are in brackets. \*\*\* p<0.001, \*\* p<0.01, \* p<0.05, + p<0.10

|                         | United States | Italy  |
|-------------------------|---------------|--------|
| Age quota               | 0.7894        | 0.9233 |
| Female                  | 0.0188*       | 0.9868 |
| Income                  | 0.7484        | 0.8935 |
| Education               | 0.4474        | 0.4356 |
| Rooted                  | 0.4041        | 0.928  |
| Personal COVID Exposure | 0.2124        | 0.7185 |
| Conservative            | 0.5893        | 0.3351 |

**Supplementary Table 6. Equality of Distribution of Key Variables by Prompts.** P-values for Kruskal–Wallis tests are reported. The Kruskal-Wallis tests for the null hypothesis that samples in each prompt condition are from the same population, for each of the variables listed above. The test is two-tailed.

| DEP VAR: SOCIAL IDENTITY    | United States |          |           | Italy    |          |           |
|-----------------------------|---------------|----------|-----------|----------|----------|-----------|
|                             | Model 1       |          |           | Model 2  |          |           |
|                             | State         | Country  | World     | Region   | Country  | World     |
|                             | (1)           | (2)      | (3)       | (1)      | (2)      | (3)       |
| Age                         | 0.004+        | 0.007*** | -0.002    | 0.009*** | 0.005+   | -0.001    |
|                             | [0.002]       | [0.002]  | [0.002]   | [0.003]  | [0.003]  | [0.003]   |
| Female                      | -0.014        | -0.014   | 0.076     | 0.07     | 0.150**  | 0.149**   |
|                             | [0.048]       | [0.045]  | [0.051]   | [0.053]  | [0.053]  | [0.052]   |
| Education Level             | 0.016         | -0.017   | 0.01      | -0.070** | 0.003    | -0.006    |
|                             | [0.020]       | [0.019]  | [0.021]   | [0.024]  | [0.024]  | [0.024]   |
| Small/Medium Metro Area     | 0.07          | 0.136*   | 0.03      | 0.013    | 0.07     | -0.032    |
|                             | [0.064]       | [0.060]  | [0.067]   | [0.058]  | [0.058]  | [0.057]   |
| Large Metropolitan Area     | 0.172*        | 0.197**  | 0.07      | 0.025    | 0.209**  | 0.056     |
|                             | [0.079]       | [0.074]  | [0.083]   | [0.079]  | [0.079]  | [0.078]   |
| Rooted                      | 0.052         | 0.119*   | 0.077     | -0.025   | 0.032    | -0.097    |
|                             | [0.057]       | [0.053]  | [0.059]   | [0.083]  | [0.083]  | [0.082]   |
| Midwest                     | -0.208**      | -0.178** | -0.012    |          |          |           |
|                             | [0.069]       | [0.064]  | [0.072]   |          |          |           |
| South                       | -0.111        | -0.056   | 0.058     |          |          |           |
|                             | [0.070]       | [0.065]  | [0.073]   |          |          |           |
| West                        | 0.006         | -0.113+  | -0.058    |          |          |           |
|                             | [0.070]       | [0.065]  | [0.073]   |          |          |           |
| South Italy                 |               |          |           | 0.071    | 0.099+   | 0.091     |
|                             |               |          |           | [0.058]  | [0.058]  | [0.057]   |
| Conservative scale          | 0.056**       | 0.253*** | -0.132*** | 0.106*** | 0.087**  | -0.174*** |
|                             | [0.021]       | [0.019]  | [0.022]   | [0.029]  | [0.029]  | [0.029]   |
| Income                      | 0.036**       | 0.029**  | 0.005     | 0.047*** | 0.030*   | -0.012    |
|                             | [0.012]       | [0.011]  | [0.013]   | [0.014]  | [0.014]  | [0.014]   |
| Income Lost                 | 0.025         | 0.107*   | 0.07      | -0.022   | 0.026    | 0.088     |
|                             | [0.049]       | [0.046]  | [0.052]   | [0.057]  | [0.057]  | [0.056]   |
| Priming State               | -0.001        | 0.06     | -0.103    | -0.141+  | 0.002    | -0.029    |
|                             | [0.069]       | [0.064]  | [0.072]   | [0.073]  | [0.073]  | [0.072]   |
| Priming Country             | -0.03         | 0.082    | -0.074    | -0.053   | -0.034   | 0.005     |
|                             | [0.068]       | [0.064]  | [0.071]   | [0.074]  | [0.074]  | [0.073]   |
| Priming World               | -0.022        | 0.066    | -0.119+   | -0.035   | 0.014    | -0.016    |
|                             | [0.067]       | [0.062]  | [0.070]   | [0.073]  | [0.073]  | [0.072]   |
| County-Level COVID Exposure | 0.002         | -0.005   | -0.007    | -0.002   | 0.006+   | -0.002    |
|                             | [0.004]       | [0.004]  | [0.005]   | [0.003]  | [0.003]  | [0.003]   |
| Personal COVID Exposure     | 0.169***      | 0.082+   | 0.214***  | 0.166**  | 0.108*   | 0.116*    |
|                             | [0.051]       | [0.048]  | [0.053]   | [0.054]  | [0.054]  | [0.053]   |
| Constant                    | 1.747***      | 1.291*** | 2.508***  | 1.961*** | 2.077*** | 3.447***  |
|                             | [0.157]       | [0.147]  | [0.165]   | [0.187]  | [0.187]  | [0.185]   |
| LR chi2                     |               | 389.27   |           |          | 169.22   |           |
| Observations                |               | 932      |           |          | 723      |           |

**Supplementary Table 7 | Econometric Analysis of Social Identity.** We fit a multivariate Tobit model (see notes to Supplementary Table 5a) to the indexes of social identity at state/region, country and world levels. See Supplementary Table 1 for variables’ definition. Standard errors are reported in brackets. \*\*\* p<0.001, \*\* p<0.01, \* p<0.05, + p<0.10.

|                         | Model 1  |          |           | Model 2  |          |           | Model 3  |          |           | Model 4  |          |           | Model 5 |          |           | Model 6 |           |           |
|-------------------------|----------|----------|-----------|----------|----------|-----------|----------|----------|-----------|----------|----------|-----------|---------|----------|-----------|---------|-----------|-----------|
| DEP VAR: AD             | Region   | Country  | World     | Region  | Country  | World     | Region  | Country   | World     |
|                         | (1)      | (2)      | (3)       | (4)      | (5)      | (6)       | (7)      | (8)      | (9)       | (10)     | (11)     | (12)      | (16)    | (17)     | (18)      | (19)    | (20)      | (21)      |
| Age                     | 0.009*** | -0.012** | 0.00      | 0.006*   | -0.010** | 0.001     | 0.009**  | -0.012** | 0.00      | 0.008**  | -0.011** | 0.005     | 0.009** | -0.011** | 0.002     | 0.006*  | -0.011*** | 0.002     |
|                         | [0.003]  | [0.004]  | [0.006]   | [0.003]  | [0.003]  | [0.005]   | [0.003]  | [0.004]  | [0.006]   | [0.003]  | [0.004]  | [0.006]   | [0.003] | [0.004]  | [0.006]   | [0.002] | [0.003]   | [0.005]   |
| Female                  | 0.097+   | -0.01    | -0.093    | 0.103+   | -0.009   | -0.088    | 0.095    | 0.035    | -0.154    | 0.087    | 0.003    | -0.106    | 0.138*  | 0.07     | -0.096    | 0.067   | 0.005     | -0.013    |
|                         | [0.056]  | [0.072]  | [0.108]   | [0.053]  | [0.067]  | [0.099]   | [0.061]  | [0.077]  | [0.120]   | [0.059]  | [0.077]  | [0.113]   | [0.068] | [0.082]  | [0.123]   | [0.051] | [0.066]   | [0.096]   |
| Education Level         | 0.003    | 0.003    | 0.047     | -0.002   | 0.024    | 0.019     | 0.015    | 0.007    | 0.022     | 0        | 0.015    | 0.016     | -0.001  | 0.013    | 0.029     | -0.002  | 0.007     | 0.042     |
|                         | [0.025]  | [0.034]  | [0.047]   | [0.024]  | [0.031]  | [0.043]   | [0.028]  | [0.036]  | [0.053]   | [0.027]  | [0.036]  | [0.049]   | [0.031] | [0.038]  | [0.054]   | [0.023] | [0.031]   | [0.041]   |
| Small/Medium Metro Area | 0.053    | -0.035   | 0.083     | 0.083    | -0.032   | 0.01      | 0.089    | -0.069   | 0.053     | 0.099    | -0.056   | -0.003    | 0.008   | -0.123   | 0.021     | 0.075   | -0.025    | -0.003    |
|                         | [0.060]  | [0.081]  | [0.117]   | [0.057]  | [0.075]  | [0.106]   | [0.067]  | [0.086]  | [0.130]   | [0.065]  | [0.086]  | [0.122]   | [0.073] | [0.091]  | [0.133]   | [0.055] | [0.073]   | [0.102]   |
| Large Metropolitan Area | 0.012    | 0.15     | -0.172    | -0.004   | 0.143    | -0.164    | -0.016   | 0.205+   | -0.216    | -0.062   | 0.213+   | -0.138    | -0.095  | 0.183    | -0.212    | 0.005   | 0.107     | -0.164    |
|                         | [0.085]  | [0.104]  | [0.165]   | [0.081]  | [0.095]  | [0.152]   | [0.094]  | [0.110]  | [0.184]   | [0.091]  | [0.110]  | [0.172]   | [0.104] | [0.115]  | [0.188]   | [0.078] | [0.094]   | [0.145]   |
| Rooted                  | -0.078   | 0.452**  | -0.242    | -0.081   | 0.363**  | -0.18     | -0.059   | 0.450**  | -0.354*   | -0.012   | 0.482*** | -0.401*   | -0.030  | 0.471**  | -0.398*   | -0.018  | 0.329**   | -0.236+   |
|                         | [0.087]  | [0.138]  | [0.156]   | [0.081]  | [0.127]  | [0.139]   | [0.094]  | [0.143]  | [0.171]   | [0.091]  | [0.145]  | [0.159]   | [0.105] | [0.153]  | [0.174]   | [0.080] | [0.127]   | [0.136]   |
| South Italy             | 0.054    | -0.084   | -0.127    | 0.028    | -0.073   | -0.069    | -0.075   | -0.014   | 0.003     | -0.05    | 0.007    | -0.051    | -0.032  | 0.049    | -0.015    | 0.088   | -0.113    | -0.127    |
|                         | [0.062]  | [0.081]  | [0.117]   | [0.059]  | [0.074]  | [0.107]   | [0.067]  | [0.084]  | [0.129]   | [0.065]  | [0.085]  | [0.121]   | [0.074] | [0.090]  | [0.132]   | [0.056] | [0.073]   | [0.103]   |
| Conservative scale      | 0.105*** | -0.003   | -0.366*** | 0.102*** | -0.013   | -0.336*** | 0.151*** | 0.025    | -0.534*** | 0.142*** | 0.013    | -0.473*** | 0.091*  | -0.058   | -0.639*** | 0.084** | -0.031    | -0.288*** |
|                         | [0.031]  | [0.042]  | [0.072]   | [0.030]  | [0.040]  | [0.067]   | [0.034]  | [0.044]  | [0.082]   | [0.033]  | [0.045]  | [0.077]   | [0.037] | [0.046]  | [0.089]   | [0.028] | [0.039]   | [0.064]   |
| Income                  | -0.015   | 0.048*   | -0.049+   | -0.011   | 0.037*   | -0.042    | -0.004   | 0.041*   | -0.05     | -0.001   | 0.037+   | -0.038    | 0       | 0.048*   | -0.038    | -0.018  | 0.047**   | -0.032    |
|                         | [0.015]  | [0.019]  | [0.029]   | [0.015]  | [0.018]  | [0.026]   | [0.017]  | [0.021]  | [0.032]   | [0.016]  | [0.021]  | [0.030]   | [0.018] | [0.021]  | [0.032]   | [0.014] | [0.018]   | [0.025]   |
| Income Lost             | 0.02     | 0.081    | -0.163    | -0.051   | 0.116    | -0.067    | -0.005   | 0.099    | -0.107    | 0.04     | 0.105    | -0.142    | 0.016   | 0.144+   | -0.045    | 0.01    | 0.104     | -0.099    |
|                         | [0.060]  | [0.077]  | [0.115]   | [0.056]  | [0.071]  | [0.106]   | [0.065]  | [0.081]  | [0.128]   | [0.064]  | [0.082]  | [0.121]   | [0.073] | [0.087]  | [0.132]   | [0.054] | [0.069]   | [0.100]   |
| Priming Region          | 0.083    | -0.047   | -0.09     | 0.115    | -0.051   | -0.084    | 0.112    | -0.097   | -0.077    | 0.13     | -0.105   | 0.056     | 0.151   | -0.036   | -0.067    | 0.086   | -0.033    | 0.022     |
|                         | [0.078]  | [0.097]  | [0.155]   | [0.074]  | [0.089]  | [0.142]   | [0.085]  | [0.104]  | [0.173]   | [0.083]  | [0.105]  | [0.163]   | [0.095] | [0.110]  | [0.178]   | [0.071] | [0.088]   | [0.137]   |
| Priming Country         | 0.105    | -0.10    | 0.066     | 0.157*   | -0.147   | 0.004     | 0.114    | -0.145   | 0.09      | 0.064    | -0.12    | 0.175     | 0.127   | -0.073   | 0.073     | 0.106   | -0.138    | 0.099     |
|                         | [0.080]  | [0.100]  | [0.153]   | [0.077]  | [0.093]  | [0.142]   | [0.088]  | [0.108]  | [0.172]   | [0.086]  | [0.108]  | [0.163]   | [0.096] | [0.112]  | [0.175]   | [0.073] | [0.091]   | [0.138]   |
| Priming World           | 0.124    | -0.265*  | 0.195     | 0.146+   | -0.249** | 0.156     | 0.073    | -0.297** | 0.350*    | 0.090    | -0.285*  | 0.323*    | 0.127   | -0.251*  | 0.345*    | 0.163*  | -0.226*   | 0.13      |
|                         | [0.078]  | [0.104]  | [0.145]   | [0.075]  | [0.096]  | [0.133]   | [0.086]  | [0.110]  | [0.164]   | [0.083]  | [0.111]  | [0.153]   | [0.095] | [0.117]  | [0.167]   | [0.071] | [0.094]   | [0.128]   |

| <i>(Continued)</i>           | (1)       | (2)      | (3)       | (4)       | (5)      | (6)       | (7)     | (8)     | (9)     | (10)     | (11)    | (12)     | (16)    | (17)    | (18)    | (19)      | (20)      | (21)      |
|------------------------------|-----------|----------|-----------|-----------|----------|-----------|---------|---------|---------|----------|---------|----------|---------|---------|---------|-----------|-----------|-----------|
| County-level COVID Exposure  | -0.005    | 0.002    | 0.01      | -0.005    | 0.001    | 0.011     | -0.005  | 0.00    | 0.011   | -0.006   | 0.002   | 0.008    | -0.003  | 0.005   | 0.013   | -0.005    | 0.001     | 0.008     |
|                              | [0.004]   | [0.005]  | [0.008]   | [0.003]   | [0.005]  | [0.008]   | [0.004] | [0.005] | [0.009] | [0.004]  | [0.005] | [0.009]  | [0.004] | [0.005] | [0.009] | [0.003]   | [0.005]   | [0.007]   |
| Personal COVID Exposure      | 0.048     | -0.074   | 0.113     | 0.032     | -0.095   | 0.118     | 0.018   | -0.121  | 0.18    | 0.03     | -0.124  | 0.187    | 0.083   | -0.101  | 0.195   | 0.061     | -0.071    | 0.1       |
|                              | [0.057]   | [0.073]  | [0.110]   | [0.054]   | [0.068]  | [0.102]   | [0.062] | [0.078] | [0.123] | [0.060]  | [0.079] | [0.115]  | [0.069] | [0.083] | [0.127] | [0.051]   | [0.066]   | [0.097]   |
| Efficiency Region            | 0.469***  | -0.271** | -0.752*** |           |          |           |         |         |         |          |         |          |         |         |         | 0.272***  | -0.206*   | -0.438*** |
|                              | [0.067]   | [0.088]  | [0.135]   |           |          |           |         |         |         |          |         |          |         |         |         | [0.070]   | [0.091]   | [0.131]   |
| Efficiency National          | -0.321**  | 0.550*** | -0.835*** |           |          |           |         |         |         |          |         |          |         |         |         | -0.152    | 0.204*    | -0.555**  |
|                              | [0.099]   | [0.102]  | [0.200]   |           |          |           |         |         |         |          |         |          |         |         |         | [0.102]   | [0.100]   | [0.189]   |
| Efficiency World             | -0.470*** | -0.416** | 0.550***  |           |          |           |         |         |         |          |         |          |         |         |         | -0.299*   | -0.145    | 0.139     |
|                              | [0.132]   | [0.148]  | [0.149]   |           |          |           |         |         |         |          |         |          |         |         |         | [0.126]   | [0.141]   | [0.131]   |
| Goal Effectiveness Region    |           |          |           | 0.399***  | -0.305** | -0.680*** |         |         |         |          |         |          |         |         |         | 0.221**   | -0.235*   | -0.395*   |
|                              |           |          |           | [0.074]   | [0.100]  | [0.151]   |         |         |         |          |         |          |         |         |         | [0.084]   | [0.111]   | [0.159]   |
| Goal Effectiveness National  |           |          |           | -0.434*** | 0.523*** | -0.421**  |         |         |         |          |         |          |         |         |         | -0.378*** | 0.396***  | -0.155    |
|                              |           |          |           | [0.090]   | [0.097]  | [0.151]   |         |         |         |          |         |          |         |         |         | [0.098]   | [0.107]   | [0.160]   |
| Goal Effectiveness World     |           |          |           | -0.440*** | -        | 0.786***  |         |         |         |          |         |          |         |         |         | -0.249*   | -0.579*** | 0.543***  |
|                              |           |          |           | [0.102]   | [0.138]  | [0.138]   |         |         |         |          |         |          |         |         |         | [0.105]   | [0.141]   | [0.139]   |
| Most Helping Self Region     |           |          |           |           |          |           | 0.137   | -0.079  | -0.076  |          |         |          |         |         |         | -0.08     | 0.078     | 0.214     |
|                              |           |          |           |           |          |           | [0.101] | [0.127] | [0.194] |          |         |          |         |         |         | [0.088]   | [0.113]   | [0.156]   |
| Most Helping Self National   |           |          |           |           |          |           | -0.285* | 0.280*  | 0.082   |          |         |          |         |         |         | -0.106    | 0.109     | 0.149     |
|                              |           |          |           |           |          |           | [0.121] | [0.142] | [0.217] |          |         |          |         |         |         | [0.106]   | [0.126]   | [0.177]   |
| Most Helping Self World      |           |          |           |           |          |           | -0.312  | -0.41   | 0.551   |          |         |          |         |         |         | -0.053    | -0.305    | 0.094     |
|                              |           |          |           |           |          |           | [0.348] | [0.439] | [0.443] |          |         |          |         |         |         | [0.306]   | [0.417]   | [0.338]   |
| People Most in Need Region   |           |          |           |           |          |           |         |         |         | 0.726*** |         |          |         |         |         | 0.395***  |           |           |
|                              |           |          |           |           |          |           |         |         |         | [0.142]  |         |          |         |         |         | [0.117]   |           |           |
| People Most in Need National |           |          |           |           |          |           |         |         |         | -0.033   | 0.192   | -0.817*  |         |         |         | 0.057     | 0.104     | -0.42     |
|                              |           |          |           |           |          |           |         |         |         | [0.099]  | [0.124] | [0.392]  |         |         |         | [0.083]   | [0.102]   | [0.297]   |
| People Most in Need World    |           |          |           |           |          |           |         |         |         | -0.191** | -0.137+ | 0.747*** |         |         |         | -0.124*   | -0.034    | 0.433***  |
|                              |           |          |           |           |          |           |         |         |         | [0.065]  | [0.083] | [0.127]  |         |         |         | [0.056]   | [0.071]   | [0.108]   |

| <i>(Continued)</i>                   | (1)       | (2)     | (3)     | (4)      | (5)     | (6)     | (7)      | (8)     | (9)     | (10)     | (11)    | (12)    | (16)     | (17)    | (18)    | (19)     | (20)    | (21)    |
|--------------------------------------|-----------|---------|---------|----------|---------|---------|----------|---------|---------|----------|---------|---------|----------|---------|---------|----------|---------|---------|
| Expectation of Contribution Region   |           |         |         |          |         |         |          |         |         |          |         |         | 0.052    |         |         | -0.015   |         |         |
|                                      |           |         |         |          |         |         |          |         |         |          |         |         | [0.068]  |         |         | [0.051]  |         |         |
| Expectation of Contribution National |           |         |         |          |         |         |          |         |         |          |         |         |          | -0.082  |         |          | -0.128+ |         |
|                                      |           |         |         |          |         |         |          |         |         |          |         |         |          | [0.081] |         |          | [0.066] |         |
| Expectation of Contribution World    |           |         |         |          |         |         |          |         |         |          |         |         |          |         | 0.021   |          |         | 0.1     |
|                                      |           |         |         |          |         |         |          |         |         |          |         |         |          |         | [0.292] |          |         | [0.227] |
| Constant                             | -0.877*** | -0.169  | 1.075** | -0.603** | -0.153  | 0.699+  | 0.806*** | -0.37   | 0.847+  | -0.677** | -0.38   | 0.277   | 0.973*** | -0.593+ | 0.732+  | -0.601** | 0.1     | 0.304   |
|                                      | [0.210]   | [0.280] | [0.390] | [0.198]  | [0.264] | [0.362] | [0.239]  | [0.309] | [0.462] | [0.219]  | [0.292] | [0.402] | [0.249]  | [0.310] | [0.431] | [0.203]  | [0.274] | [0.368] |
| LR chi2                              |           | 490.13  |         |          | 678.96  |         |          | 228.51  |         |          | 291.99  |         |          | 182.87  |         |          | 802.56  |         |
| Observations                         |           | 556     |         |          | 556     |         |          | 556     |         |          | 556     |         |          | 714     |         |          | 550     |         |

**Supplementary Table 8 | Econometric analysis of charity characteristics effects on Aggregate Donations (AD).** Answers to the open-ended questions from donors regarding the reason for donation are used to create measures of charity characteristics. See also notes to Supplementary Table 5a and Supplementary Table 1 for description of variables.

| Charity guessed as<br>experimenter preference | Matches<br>(P C) | Nonmatches<br>(P notC) |
|-----------------------------------------------|------------------|------------------------|
| State/Region<br>(n = 132)                     | 35/111<br>(31%)  | 97/383<br>(25%)        |
| National<br>(n = 220)                         | 65/136<br>(48%)  | 155/358<br>(43%)       |
| International<br>(n = 142)                    | 52/144<br>(36%)  | 90/350<br>(26%)        |

**Supplementary Table 9 | Frequency of charity guessed as experimenter’s preference.** n is the number of participants who answered positively to the question that experimenter had a preference over which charity the participant should have chosen, for each of the three charities primed in the instructions (see Supplementary Note SN6: Section I.16: Question 70, 70a, 70b). P|C is the probability that participants stated that the charity preferred by the researcher was the one primed in the instructions (see Supplementary Note SN6: Section I.2). P|notC is the probability that participants stated that the charity preferred by the researcher was one not primed in the instructions. (1- P|C- P|notC) is the residual probability that the participant stated that the researcher had no preference.

| United States & Italy   |                      |
|-------------------------|----------------------|
|                         | Model 1              |
| DEP VAR: <i>P</i>       | (1)                  |
| Age                     | -0.005<br>[0.005]    |
| Female                  | -0.277*<br>[0.111]   |
| Education Level         | -0.026<br>[0.047]    |
| Small/Medium Metro Area | 0.165<br>[0.133]     |
| Large Metropolitan Area | 0.321+<br>[0.165]    |
| Rooted                  | -0.092<br>[0.142]    |
| Italy                   | -0.012<br>[0.130]    |
| Conservative scale      | 0.252***<br>[0.052]  |
| Income                  | 0.007<br>[0.027]     |
| Income Lost             | 0.200+<br>[0.114]    |
| Priming State/Region    | 0.074<br>[0.162]     |
| Priming Country         | 0.347*<br>[0.157]    |
| Priming World           | 0.334*<br>[0.155]    |
| Constant                | -1.486***<br>[0.349] |
| LR chi2                 | 46.72                |
| Observations            | 1,654                |

**Supplementary Table 10 | Determinants of perception of experimenter’s preference.** A logit model was fitted having a dichotomous dependent variable taking value of either 1 if the participant answered affirmatively to the question whether the researcher had a preference over which charity the participant should have chosen, or 0 otherwise (see Supplementary Note SN6: Section I.2 and Section I.16: Question 70, 70a, 70b). The covariates are described in Supplementary Table 1. Standard errors are in brackets. \*\*\* p<0.001, \*\* p<0.01, \* p<0.05, + p<0.10

62 **Supplementary Figures**

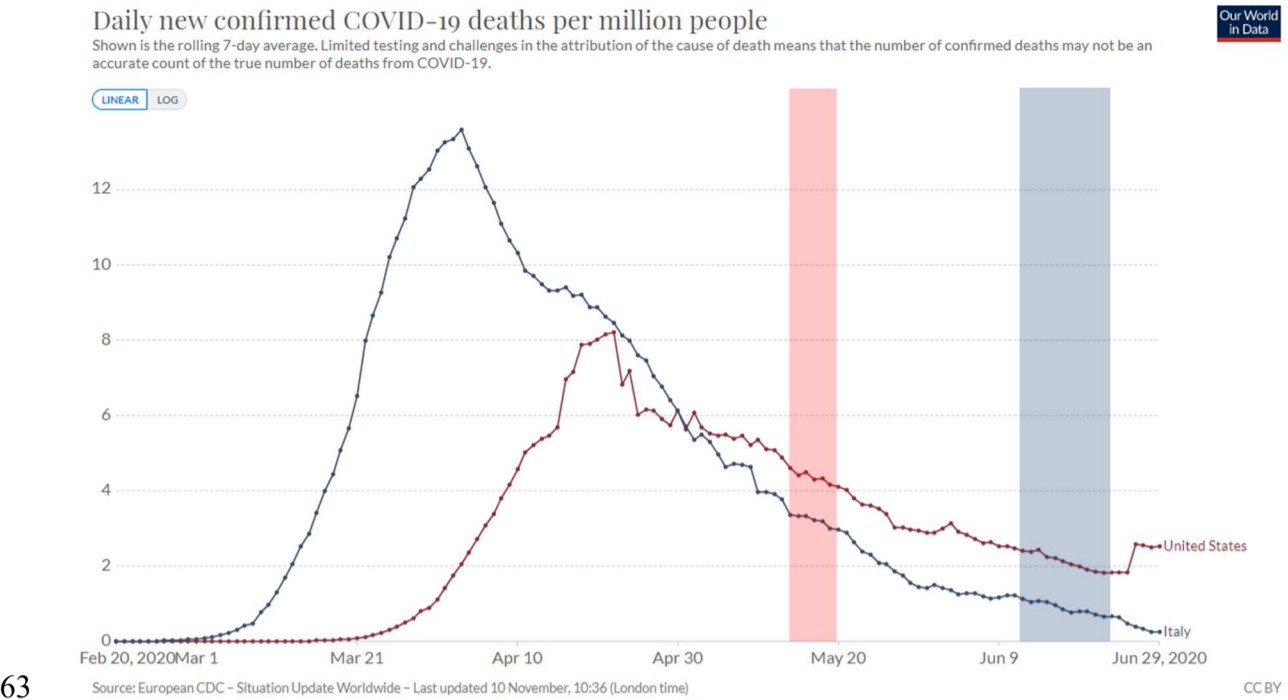

64 **Supplementary Figure 1: Evolution of death count per million people in the U.S. and Italy.** The

65 red and the blue lines plot the evolution of deaths per million people in the U.S. and Italy, respectively.

66 The two bars denote the periods of data collection in the U.S. (red bar) and Italy (blue bar). Source:

67 Our World in Data (<https://ourworldindata.org/>) accessed on 10th November 2020.

68

69

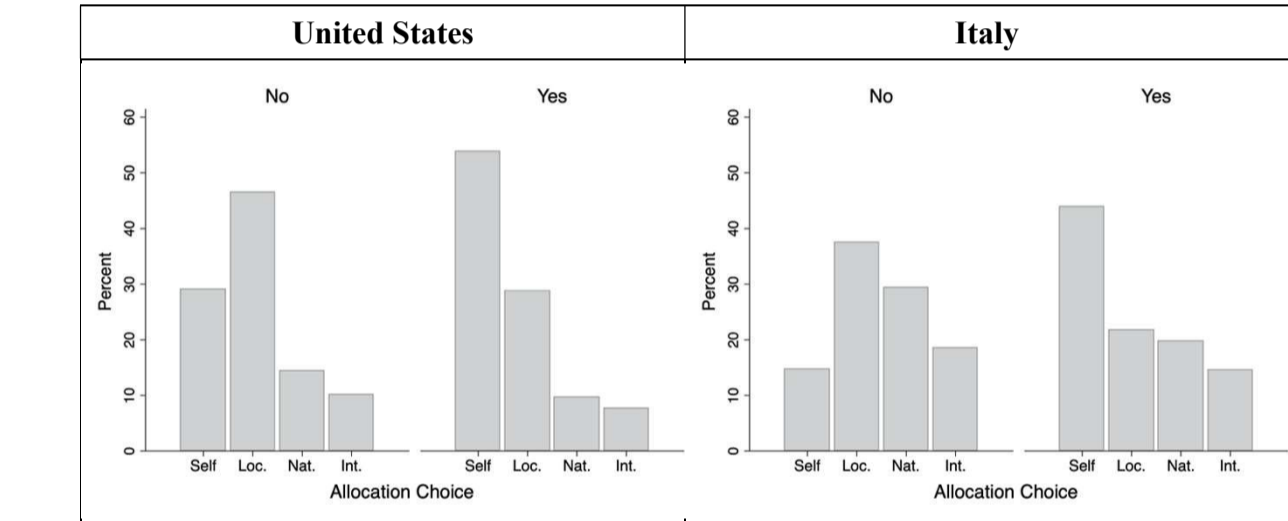

70 **Supplementary Figure 2. Donation decisions as a function of perceived experimenter demand.**

71 The ‘Yes’ and ‘No’ panels of the figure refer to participants answering “Yes”, or “No”, respectively,

72 to Question 70 of the survey: “Do you think that the researchers preferred you to donate to one of the

73 specific charities?” (see Supplementary Note 5). The histograms plot the frequency of the allocation

74 chosen by each group.

75

## 76 **Supplementary Notes**

### 77 **SN1: Pre-registration of hypotheses**

78 As stated in the paper, the pre-registration of hypotheses and the pre-analysis plan is available  
79 at the Open Science Foundation repository at these links: <https://osf.io/k74gm> (for fieldwork  
80 in the U.S.) and <https://osf.io/z82vc> (for fieldwork in Italy). Since the Open Science  
81 Foundation did not allow the use of mathematical notation, nor the uploading of figures, we  
82 have deposited more reader-friendly versions of the pre-registration documents, which include  
83 mathematical notation, as well as a figure detailing the determination of the sample size based  
84 on power analysis, at this link:  
85 [https://osf.io/fzy4a/?view\\_only=33071666dc394af8a96c560d78827ae9](https://osf.io/fzy4a/?view_only=33071666dc394af8a96c560d78827ae9). Our dataset has also  
86 been deposited in this Open Science Foundation repository and is available at the same link.

### 87 **SN2: Analysis of effects of prompts on social identity**

88 We conjectured that prompting the participant to frame the COVID-19 pandemic as being  
89 mainly relevant to one of the three levels considered (state/regional; or national; or  
90 international) would have increased social identity to the corresponding level, in comparison  
91 with baseline. Given the predicted positive effect of social identity on donations, we thus  
92 expected that prompting would have had an indirect positive effect on donations. We report  
93 the results of econometric analysis regarding this hypothesis in the Supplementary Table 7.  
94 The dependent variable was the social identity index (See Suppl. Table 1) and the set of  
95 covariates was the same as that used for other analyses. We found that our hypothesis was not  
96 supported, as priming was never significant at any level in comparison to baseline, in  
97 particular for the level of social identity that was primed. A plausible interpretation of this  
98 result is that the prompt manipulation did not override participants' prior perspective on the

99 scope of the pandemic crisis. It is interesting to note that Personal COVID exposure had a  
100 significant effect in increasing social identity at all three levels in both countries.

### 101 **SN3: Analysis of demographic effects and additional variables**

102 The main direction of demographic effects was already commented in the paper, mainly  
103 looking at results from Supplementary Table 2. Reading the results from Supplementary  
104 Table 2 in combination with those from Supplementary Table 5a permits the analysis of both  
105 participants' general propensity to donate and of how this is distributed across the three levels  
106 of donation. It is worth noting that the tendency for females to donate more than men, which  
107 is apparent from Supplementary Table 2, was only statistically significant at the local level in  
108 both the U.S. ( $p=0.004$ ) and Italy ( $p=0.032$ ) (Suppl. Table 5a, columns 1 and 10).  
109 Nevertheless, in the multivariate analysis coefficients for female donations to country and  
110 world charities were roughly similar in size and with the same sign (with the exception of  
111 world charity in Italy) to the coefficient for the local charity, while standard errors were  
112 higher. This suggests that the lack of significance for female donations to country and world  
113 charity could be driven by coefficients being more imprecisely estimated, rather than as a  
114 weaker effect, as fewer participants chose the country and the world charity than  
115 state/regional charities. The same interpretation arguably does to apply to Age. In this case,  
116 the effect of Age was positive and highly significant for donations to state-level charity in  
117 both the U.S. ( $p<0.001$ ) and Italy ( $p=0.006$ ), while the effect of Age was negative and  
118 significant for donations to country-level charities in both the U.S. ( $p=0.027$ ) and Italy  
119 ( $p=0.014$ ). This means that older people tended to donate more to the state/regional level than  
120 younger ones, while the opposite occurred for donations to the national charities. The effect of  
121 Age for donations to world charities was instead indistinguishable from zero in both the U.S.  
122 ( $p=0.88$ ) and Italy ( $p=0.46$ ). It is remarkable that the coefficients of Age were the same in the  
123 two countries for each level (Suppl. Table 5a, Model 1 for U.S. and Italy). It is also of interest

124 that “rooted” participants, that is, participants who were born in the country and whose  
125 parents were also born in the country, tended to give less to the world charity than “unrooted”  
126 participants, both in the U.S. ( $p=0.018$ ) and Italy ( $p=0.032$ ). While rooted Italians donated  
127 significantly more than “unrooted” Italians to the national charity ( $p=0.001$ ), there was no  
128 such effect in the U.S. ( $p=0.84$ ) (Suppl. Table 5a, Models 1 for U.S. and Italy).

129 It is worth noting that while the effect of the Conservative scale was negative and highly  
130 significant for donations to the world charity in both the U.S. ( $p=0.003$ ) and Italy ( $p<0.001$ ),  
131 conservatives tended to give more than liberals to the regional charity in Italy ( $p=0.021$ ),  
132 while they tended to give less, albeit insignificantly so, to the state-level charity in the U.S.  
133 ( $p=0.12$ ). Conservative-leaning people also tended to give less to the national charity in the  
134 U.S. ( $p=0.046$ ) and Italy, albeit insignificantly in the latter case ( $p=0.27$ ) (Suppl. Table 5a,  
135 Model 1 for U.S. and Italy). The effect of the Conservative scale was significantly higher in  
136 Italy than the U.S. both for donations to the world charity ( $p<0.001$ ), and for donations to the  
137 state/regional charity ( $p=0.038$ ) (Suppl. Table 5b, Model 4). Overall, conservatives tended to  
138 keep all the bonus for themselves in both countries ( $p<0.001$  for both countries), and to  
139 donate less once they made a donation ( $p<0.001$  for both countries), in comparison to liberals  
140 (Suppl. Table 2a, Model 2 for U.S. and Italy).

141 It is also of interest to note that having experienced income losses due to COVID-19 did not  
142 affect either propensity to donate or patterns of donations, as this variable was never  
143 significant (Suppl. Tables 2 and 5a). Likewise, no effect of the area of residence could be  
144 detected in either country.

145 Initial runs of the model for the U.S. data included dummy variables for race, but these had no  
146 significant effects and were taken out of the models in order to maintain comparability with  
147 the Italian analyses. In our pre-analysis plan we hypothesized that trust in people from the  
148 same state/region as the participant, country, or world, may have affected propensity to donate

149 at the different levels. We report the results of this analysis in Supplementary Table 5a,  
150 Models 3, in a multivariate Tobit model including the same set of regressors as that used in  
151 previous analyses, also including social identity indexes. These variables were generally  
152 insignificant predictors of donation to any level, with a few exceptions (for instance, Trust in  
153 Local Community predicted donations to the state in the U.S.,  $p=0.049$ ). Some of these  
154 variables would have had higher significance had social identity indexes not been included as  
155 covariates, but they lost significance when controlling for social identity. Conversely, the  
156 coefficients of social identity variables remained nearly unaffected by the inclusion of  
157 additional covariates, as can be seen comparing Models 2 and 3 in Supplementary Table 5a.  
158 We also conjectured that an index of psychological vulnerability, and the experience of losses  
159 in social relationships (see Suppl. Table 1 for variables' definition), may have affected the  
160 patterns of donation. However, this did not prove to be the case after we controlled for all  
161 other factors. The participant's position in the labor market was also insignificant (Suppl.  
162 Table 5a, Models 3). Finally, we note that all the above results tended to be qualitatively  
163 similar when we analyzed the probability of choosing a particular charity, rather than the *AD*  
164 to that charity, in multivariate Probit models (Suppl. Tables 5c-d).

#### 165 **SN4: Analysis of charity characteristics**

166 The results reported in the paper were based on Model 6 in Supplementary Table 8, in which  
167 all the variables pertaining to charity characteristics were simultaneously included. Results  
168 were qualitatively similar if each set of variables pertaining to each variable was considered in  
169 isolation from all others, as done in the five other models of Supplementary Table 8. Not  
170 surprisingly, significance levels were generally higher in the latter case, as charity  
171 characteristics were positively correlated with each other.

172

173

174 **SN5: Analysis of experimenter demand effects**

175 We investigated the existence of possible experimental demand effects associated with the  
176 framing manipulation through responses to two questions asked at the very end of the  
177 questionnaire.

178 The first question asked whether the participant thought that the researcher had any preference  
179 about which charity the participant should have chosen. The second question was asked  
180 conditionally on the participant answering affirmatively to the first question, and asked the  
181 participant to state which charity the researcher would have preferred the participant to choose  
182 (See Supplementary Note SN5: Section I.16: Questionnaire Q70-70b).

183 In response to the first question, approximately 70% of respondents answered “No” in both  
184 the U.S. and Italy. Of those who responded “Yes” ( $n = 494$ ), 103 were in the Control  
185 condition where no reference to any of the ingroups (state/region, nation, or world) had been  
186 given. For those in the three experimental conditions who said “Yes” ( $n = 391$ ), we assessed  
187 whether their guess about the experimenters’ preference corresponded to the frame they had  
188 received. Only 39% of guesses matched the level of ingroup that had been mentioned in the  
189 paragraph they read.

190 Supplementary Table 9 reports the proportion of respondents who guessed a charity that  
191 corresponded to the framing condition they had been in (“matches”) compared to the  
192 proportion who named that charity among those in other conditions (“non-matches”). For  
193 those who ventured a guess, the probability that the guess matched the frame was consistently  
194 higher than the proportion of mismatch guesses, but the difference was very small and  
195 statistically significant only for the international guesses [ $z(\text{state}) = 1.30$ ,  $p = 0.19$ ;  $z(\text{nation}) =$   
196  $0.90$ ,  $p = 0.37$ ;  $z(\text{world}) = 2.32$ ,  $p = 0.02$ ]. In total, only 9% of our participants expressed a  
197 belief in experimenter demand and correctly named the charity that corresponded to the  
198 framing manipulation they had been exposed to.

199 *Match and Mismatch Guesses*

200 Although there is little evidence from the above analysis that many participants had accurately  
201 picked up a demand signal from the experimental manipulation, we did examine further  
202 whether their perception of experimenter intent influenced choices among the four options  
203 available (keep the money for self; donate to state/region charity; donate to national charity;  
204 donate to international charity).

205 First, we compared those who had answered “Yes” to the question about experimenter  
206 preference to those who said “No.” As is evident in Supplementary Figure 2, the percentage  
207 of people deciding to keep the bonus for oneself was disproportionately higher in the former  
208 group. The null hypothesis of equality of distributions was rejected in both countries (Mann-  
209 Whitney-Wilcoxon (MWW) test:  $p < 0.001$ ,  $N = 932$  in the U.S.,  $p < 0.001$ ,  $N = 723$  in Italy). The  
210 distribution among the group answering “Yes” was similar in the two countries and a Mann-  
211 Whitney test failed to reject the null of equality of distributions between countries (MWM:  
212  $p = 0.057$ ;  $N = 494$ ). We fitted a logit model to explore which factors were most associated with  
213 the perception of a researcher preference (Yes vs No). Results are reported in Supplementary  
214 Table 10. Conservatives were significantly more likely to perceive a bias than liberals, and  
215 men more likely than women. Participants who were given the National and World frame  
216 were also significantly more likely to perceive a bias than those in the Control condition, but  
217 framing condition did not affect which charity they chose. Finally, we examined whether  
218 there was a relationship between which charity the respondent named and the distribution of  
219 choices. For instance, did those who guessed that the researchers had a preference for the  
220 country charity, actually choose country with higher (or lower) frequency than others? For all  
221 three levels, we failed to reject the null hypothesis of equality of distribution between  
222 participants who had guessed one of the charities compared to those who had not guessed that

223 charity (chi2 tests on pooled sample:  $p=0.78$  for state/region level;  $p=0.91$  for national level;  
224  $p=0.21$  for world level).

225 Overall, there was an association between perceiving an experimenter demand effect and  
226 choosing not to donate, and this reactance effect was particularly evident in the world frame  
227 condition. However, the number of respondents showing that pattern was very small and did  
228 not significantly affect the decision results in our study.

229    **SN6: Instructions**

230    The questionnaire reported below was administered in both the US and Italy on samples of  
231    national residents. In the questions below:  
232    - <name of country> means that either “the US” or “Italy” was used;  
233    - <state/region> means that “state” was used for the US, and “region” in Italy;  
234    - <name of previously selected state in the US / region in Italy> reported the state or region  
235    selected in Q12;  
236    - Text reported under titles <*Control condition*>, <*Local condition*>, <*National condition*>,  
237    <*World condition*> was administered to participants who had been randomly assigned to one  
238    of the four conditions, following a between-subject design. Qualtrics randomly assigned  
239    participants to a condition, following a fixed sequence whose order had been previously  
240    randomized.  
241    - Headlines in bold italics such as <*Framing*> were not read by participants, but mark the  
242    different sections of the questionnaire.- Notes in italics between the symbols < > were also  
243    not read by participants.

244    **Life in the time of COVID19**

245    <*I.1. Initial Demographics*>  
246    \_\_\_\_\_

247    Q1 Please enter your Prolific ID here  
248    \_\_\_\_\_

249    Q2 What is your sex?  
250        ☐ Male  
251        ☐ Female  
252        ☐ Other

253    Q3 What year were you born?  
254    \_\_\_\_\_

255    Q4 Were you born in <Name of country>?  
256        ☐ Yes  
257        ☐ No

258    (If No in Q4:) Q4a Which country were you born in?

259    (If No in Q4:) Q4b In which year did you come to <Name of country>?

260    Q5 What is your <Name of country> citizenship status?  
261        ☐ Citizen  
262        ☐ Not a citizen  
263        ☐ Rather not answer

264    Q6 Was your **mother** born in <Name of country>?  
265        ☐ Yes  
266        ☐ No

267    Q7 Was your **father** born in <Name of country>?

268

☐ Yes

269

☐ No

270

Q8 Have you ever resided outside <Name of country> for more than a year?

271

☐ Yes

272

☐ No

273

Q9 What is the highest level of education you completed?

274

☐ Primary

275

☐ High School/Secondary School

276

☐ Some College

277

☐ Technical School or Diploma, Trade Certificate or Other Post-high School

278

Qualification other than University

279

☐ Undergraduate Degree (e.g. BA, BS)

280

☐ Masters

281

☐ Doctoral Degree or Professional Degree

282

Q10 What is your marital status?

283

☐ Single

284

☐ Married

285

☐ Divorced/Separated

286

☐ Widowed

287

☐ Living with Partner

288

Q11 Do you live in a

289

☐ Large Metropolitan Area (More than 1.5 Million Inhabitants)?

290

☐ Medium-sized Metropolitan area (500,000 to 1.5 Million Inhabitants)?

291

☐ Small Metropolitan Area (200,000 to 500,000 Inhabitants)?

292

☐ Town (50,000 to 200,000 Inhabitants)?

293

☐ Village (Less than 50,000 Inhabitants)?

294

☐ Rural Area?

295

Q12 In which <state/region> do you currently reside?

296

Q13 What is your zip code?

297

298 <I.2 Framing>

299 The Corona virus (Covid-19) pandemic is clearly a major medical and economic crisis <Local  
300 Condition: for <name of previously selected state in the US / region in Italy>>; <National  
301 Condition: for <the United States / Italy>>; <World Condition: for the world>. In addition  
302 to the mounting death toll, this new virus has revealed how unprepared we are to cope with  
303 novel diseases that lead to serious illness and death for a large number of people all at the  
304 same time. **Medical facilities** <Local Condition: around <name of previously selected state  
305 in the US / region in Italy>>; <National Condition: around <the United States / Italy>>;  
306 <World Condition: around the world> are being overburdened with cases and medical  
307 staff are risking their own health to care for those who are critically ill. And the efforts we are  
308 making to slow the spread of infection have created **serious economic hardships** <Local  
309 Condition: throughout <name of previously selected state in the United States / region in  
310 Italy>>; <National Condition: throughout <the United States / Italy>>; <World Condition:  
311 throughout the world>. Loss of jobs and loss of business mean that families are in need and  
312 <Control Condition: we are>; <Local Condition: <name of previously selected state in the  
313 US / region in Italy>> is>; <National Condition: <the U.S. / Italy> is>; <World Condition:  
314 the world is> facing economic recession. Coordinated efforts are needed to meet both the  
315 medical and economic crisis that this pandemic has created. **Cooperation** <Local Condition:  
316 within <name of previously selected state in the US / region in Italy>>; within <National  
317 Condition: throughout <the United States / Italy>>; <World Condition: around the  
318 world> is essential in this crisis because we are all in this together.

319 Q14a How serious do you believe the COVID-19 crisis to be <Local Condition: for <name of  
320 previously selected state in the US / region in Italy>>; <National Condition: for <the  
321 United States / Italy>>; <World Condition: for the world>?

- 322 ○ Not At All Serious
- 323 ○ Somewhat Serious
- 324 ○ Moderately Serious
- 325 ○ Very Serious
- 326 ○ Extremely Serious

327   <I.3 Allocation choice>

328   Because this research is being conducted at the height of the corona virus pandemic crisis, the  
329   funders of the project have agreed to use part of the research funds to **provide opportunity**  
330   **for contributing to relief efforts**. As a participant in this study, you will be given a **bonus**  
331   **payment of <\$5/€4>** in addition to the <\$3/2.5€> payment that is the base pay for you  
332   completing this survey.

333   You may keep the bonus payment for yourself or **you can choose to donate some, all or**  
334   **none of it** to one of three charitable foundations that are providing food, medical and other  
335   assistance to individuals and families that have been seriously impacted by the pandemic.

336   The three options for donation are the following: · Charity A: money donated to this charity  
337   will go to an organization in <name of previously selected state in the US / region in Italy>  
338   to provide for those most affected by the pandemic across the state. · Charity B: money  
339   donated to this charity will go to a national organization to provide for those most affected by  
340   the pandemic across the United States. · Charity C: money donated to this charity will go to  
341   an international organization to provide for those most affected by the pandemic across  
342   the world.

343   If you choose to make a donation, you will first have to select one among those three options.  
344   Then you will be asked to indicate how much money you want to contribute toward that  
345   organization. This can be any amount up to \$5.00. You will also have an option not to make  
346   any donation.

347   NOTE: For any amount of money you contribute, we will double that amount by a matching  
348   donation from our funds. So for instance: · If you contribute \$3 of the \$5 bonus payment to  
349   one of the three charities, we will add another \$3 so that the total money donated to that  
350   charity will be \$6 (and you keep \$2 of the bonus payment for yourself); · If you  
351   contribute \$1.50 to any of the charities, the charity will receive \$3 total (and you  
352   keep \$3.50 of the \$5 bonus payment ), and so forth.

353 <I.4: Comprehension check>

354 Q15-1 <We only report values for USD in the following text. These values were converted  
355 into Euros in the Italian version of the questionnaire.>  
356  
357 Suppose you select Charity B and donate \$2. Below please indicate:  
358 - How much money does Charity A receive?  
359 - How much money does Charity B receive?  
360 - How much money does Charity C receive?  
361 - How much **bonus** money goes to you? (not including your \$3 base pay) Remember for any  
362 amount of money you contribute, we will double that amount by a matching donation from  
363 our funds.

|           |               |
|-----------|---------------|
| Charity A | ▼ \$0 ... \$5 |
| Charity B | ▼ \$0 ... \$5 |
| Charity C | ▼ \$0 ... \$5 |
| You       | ▼ \$0 ... \$5 |

364 -----  
365 <If answer is correct at first try:> Your answer is correct. Charity B will receive \$4 and you  
366 will have \$3 dollars as bonus. Charity A and Charity C will not get any donations.  
367  
368 <If answer is incorrect at first try:> **Your answer was mistaken.** Remember:  
369 As a participant in this study, you will be given a bonus payment of \$5 in addition to the \$3  
370 payment that is the base pay for you completing this survey.  
371 You may keep the bonus payment for yourself or you can choose to donate some, all or none  
372 of it to one of three charitable foundations that are providing food, medical and other  
373 assistance to individuals and families that have been seriously impacted by the pandemic.  
374 For any amount of money you contribute, we will double that amount by a matching donation  
375 from our funds.

376 Q15-2  
377 <If answer is incorrect at first try:> Here is the test question again:  
378 Suppose you select Charity B and donate \$2. Below please indicate:  
379 - How much money does Charity A receive?  
380 - How much money does Charity B receive?  
381 - How much money does Charity C receive?  
382 - How much bonus money goes to you? (not including your \$3 base pay)

|           |               |
|-----------|---------------|
| Charity A | ▼ \$0 ... \$5 |
| Charity B | ▼ \$0 ... \$5 |
| Charity C | ▼ \$0 ... \$5 |
| You       | ▼ \$0 ... \$5 |

383 -----

384 <If answer is correct at second try:> Your answer is correct. Charity B will receive \$4 and  
385 you will have \$3 dollars as bonus. Charity A and Charity C will not get any donations.  
386  
387 <If answer is incorrect at second try:> **Your answer was mistaken.** Remember:  
388 - **only one charity** receives your donation; the others do not receive anything  
389 - the chosen charity receives **double the amount you donated** (so if you donated \$2, that  
390 charity receives \$4)  
391 - the amount you keep is **\$5 minus the amount you donated**  
392 -----  
393 Q15-3  
394 <If answer is correct at second try:> Here is the test question again (If you do not get it  
395 correct this time unfortunately your participation in the survey will be discontinued and you  
396 will not receive any payment. Suppose you select Charity B and donate \$2. Below please  
397 indicate:  
398 - How much money does Charity A receive?  
399 - How much money does Charity B receive?  
400 - How much money does Charity C receive?  
401 - How much bonus money goes to you? (not including your \$3 base pay)

|           |               |
|-----------|---------------|
| Charity A | ▼ \$0 ... \$5 |
| Charity B | ▼ \$0 ... \$5 |
| Charity C | ▼ \$0 ... \$5 |
| You       | ▼ \$0 ... \$5 |

402 -----  
403 <If answer is correct at third try:> Your answer is correct. Charity B will receive \$4 and you  
404 will have \$3 dollars as bonus. Charity A and Charity C will not get any donations.  
  
405 <If answer is incorrect at third try:> Your response was incorrect again. Charity B would  
406 receive \$4 and you would have \$3 dollars as bonus. Charity A and Charity C would not get  
407 any donations.  
408 We are sorry, your survey will be terminated and you will not receive any payment. Thank  
409 you.

410   <I.5: Decision>

411   **NOW WE WANT YOUR ACTUAL DECISION...**

412   -----

413   Q16 To which organization do you want to contribute?

414       ○   <name of previously selected state in the U.S. / region in Italy> aid organization

415       ○   National aid organization

416       ○   International aid organization

417       ○   I do not want to donate

418   

419   -----

420   <If first option is selected:> Q17a How much money do you want to contribute to the <name of

421   previously selected state in the U.S. / region in Italy> aid organization? (At the end of the survey

422   you will be given our email address. If you want to receive certification of our donations to

423   organizations, please write to us and we will be happy to show such certification when our

424   survey is completed.)

425   Fill in any amount up to <\$5.00 / €4.00> in <dollars/euros> and cents.

426   \_\_\_\_\_

427   <If second option is selected:> Q17b How much money do you want to contribute to this

428   national aid organization? (At the end of the survey you will be given our email address. If you

429   want to receive certification of our donations to organizations, please write to us and we will be

430   happy to show such certification when our survey is completed.)

431   Fill in any amount up to <\$5.00 / €4.00> in <dollars/euros>and cents.

432   \_\_\_\_\_

433   <If third option is selected:> Q17c How much money do you want to contribute to this global

434   aid organization? (At the end of the survey you will be given our email address. If you want to

435   receive certification of our donations to organizations, please write to us and we will be happy to

436   show such certification when our survey is completed.)

437   Fill in any amount up to <\$5.00 / €4.00> in <dollars/euros>dollars and cents.

438   \_\_\_\_\_

439   Thank you. Now we will go on with the remainder of the survey.

440    <I.6: Exposure to COVID19>

441    Q18a Have you been diagnosed with COVID-19?

442        ☐ Yes

443        ☐ No

444    Q18b Have you been hospitalized?

445        ☐ Yes

446        ☐ No

447    Q19a Has someone you live with been diagnosed with COVID-19?

448        ☐ Yes

449        ☐ No

450        ☐ Do not know

451

452    Q19b Have they been hospitalized?

453        ☐ Yes

454        ☐ No

455        ☐ Do not know

456    Q20a Has a family member or a close friend (not living with you) been diagnosed with COVID-

457    19?

458        ☐ Yes

459        ☐ No

460        ☐ Do not know

461    Q20b Have they been hospitalized?

462        ☐ Yes

463        ☐ No

464        ☐ Do not know

465    Q21a Has any of your neighbors, acquaintances or colleagues diagnosed with COVID-19?

466        ☐ Yes

467        ☐ No

468        ☐ Do not know

469    Q21b Have they been hospitalized?

470        ☐ Yes

471        ☐ No

472        ☐ Do not know

473    Q22 Do you have a family member, neighbor, acquaintance or colleague who died from COVID-

474    19?

475        ☐ Yes

476        ☐ No

477        ☐ Do not know

- 478

Q23 Please pick the option that best describes you
- 479

I worry about getting infected with Covid-19
- 480

☐ Always
- 481

☐ Most of the time
- 482

☐ About half the time
- 483

☐ Sometimes
- 484

☐ Never
- 485

Q24 I feel vulnerable to Covid-19 infection
- 486

☐ Strongly agree
- 487

☐ Somewhat agree
- 488

☐ Neither agree nor disagree
- 489

☐ Somewhat disagree
- 490

☐ Strongly disagree
- 491

Q25 I worry about my local community being infected with Covid-19
- 492

☐ Always
- 493

☐ Most of the time
- 494

☐ About half the time
- 495

☐ Sometimes
- 496

☐ Never

497    <I.7: *Connectedness*>

498    Q26a **Prior** to the COVID-19 pandemic, how often did you socialize with friends **in person**?

499        ☐ Daily

500        ☐ Several days a week

501        ☐ Once a week

502        ☐ Less than once a week

503        ☐ Never

504    Q26b **Since** the COVID-19 pandemic, how often do you socialize with friends **in person**

505    (compared to before)?

506        ☐ Much more

507        ☐ Somewhat more

508        ☐ About the same

509        ☐ Somewhat less

510        ☐ Much less

511    Q27a **Prior** to the COVID-19 pandemic, how often did you use the **phone, text or internet** to

512    connect with friends who live in <name of previously selected state in the U.S. / region in

513    **Italy**>?

514        ☐ Daily

515        ☐ Several days a week

516        ☐ Once a week

517        ☐ Less than once a week

518        ☐ Never

519    Q27b **Since** the COVID-19 pandemic, how often do you use the **phone, text or internet** to

520    connect with friends who live in <name of previously selected state in the U.S. / region in

521    **Italy**> (compared to before)?

522        ☐ Much more

523        ☐ Somewhat more

524        ☐ About the same

525        ☐ Somewhat less

526        ☐ Much less

527    Q28a **Prior** to the COVID-19 pandemic, how often did you use the **phone, text or internet** to

528    connect with friends who live <in other states in the U.S.> or <other regions in Italy>?

529        ☐ Daily

530        ☐ Several days a week

531        ☐ Once a week

532        ☐ Less than once a week

533        ☐ Never

534

535 Q28b **Since** the COVID-19 pandemic, how often do you use the **phone, text or internet** to  
536 connect with friends who live in <**other states in the U.S.**> or <**other regions in**  
537 **Italy**> (compared to before)?  
538     ☐ Much more  
539     ☐ Somewhat more  
540     ☐ About the same  
541     ☐ Somewhat less  
542     ☐ Much less

543 Q29a **Prior** to the COVID-19 pandemic, how often did you use the **phone, text or internet** to  
544 connect with friends who live **in other parts of the world**?  
545     ☐ Daily  
546     ☐ Several days a week  
547     ☐ Once a week  
548     ☐ Less than once a week  
549     ☐ Never

550 Q29b **Since** the COVID-19 pandemic, how often do you use the **phone, text or internet** to  
551 connect with friends who live in **other parts of the world** (compared to before)?  
552     ☐ Much more  
553     ☐ Somewhat more  
554     ☐ About the same  
555     ☐ Somewhat less  
556     ☐ Much less

557 Q30 Is either your mother or your father or both residing outside the <**Name of country**>?  
558     ☐ Yes  
559     ☐ No

560 Q31 **In the last year, prior** to the COVID-19 pandemic, how often did you engage in **volunteer**  
561 **activities**?  
562     ☐ Daily  
563     ☐ A few times a week  
564     ☐ A few times a month  
565     ☐ A few times a year  
566     ☐ Never

567 Q32 **Since** the COVID-19 pandemic, how often do you engage in **volunteer activities**  
568 (compared to before)?  
569     ☐ Much more  
570     ☐ Somewhat more  
571     ☐ About the same  
572     ☐ Somewhat less  
573     ☐ Much less

- 574

575

576

577

578

579

580
- Q33 How many organizations are you actively involved in outside of work? (This includes social, professional, athletic, religious, civic, political organizations, etc.).

☐ 1-2

☐ 3-4

☐ 5-6

☐ More than 6

☐ None
- 581

582

583

584

585

586

587

588
- Q34a **Prior** to the COVID-19 pandemic, in an average month, how often did you **attend meetings of these organized groups (outside of work-related meetings)**?

☐ Daily

☐ A few times a week

☐ A few times a month

☐ Once a month

☐ A few times a year

☐ Never
- 589

590

591

592

593

594

595
- Q34b **Since** the COVID-19 pandemic, in an average month, how often do you **attend meetings of these organized groups (outside of work-related meetings compared to before)**?

☐ Much more

☐ Somewhat more

☐ About the same

☐ Somewhat less

☐ Much less
- 596

597

598

599

600

601

602
- Q35a **Prior** to the COVID-19 pandemic, how strongly did you feel **connected to people in your neighborhood**?

☐ Not at all

☐ Somewhat not connected

☐ Neither connected nor not connected

☐ Somewhat connected

☐ Very connected
- 603

604

605

606

607

608

609
- Q35b **Since** the COVID-19 pandemic, how strongly do you feel **connected to people in your neighborhood**?

☐ Not at all

☐ Somewhat not connected

☐ Neither connected nor not connected

☐ Somewhat connected

☐ Very connected
- 610

611

612

613

614
- Q36 Who lives with you in your household? Check all that apply:

☐ I live alone

☐ My partner or spouse

☐ My Parents

☐ One child

- 615       ○ Two children
- 616       ○ Three or more children
- 617       ○ A friend or relative
- 618       ○ Multiple friends or relatives

621   <I.8: Social Identity>

622   Q37a How strongly do you feel attachment to <name of previously selected state in the U.S. /

623   region in Italy>?

- 624       ○ Not at all
- 625       ○ Somewhat
- 626       ○ Strongly
- 627       ○ Very strongly

628   Q37b How strongly do you define yourself as a member of the <name of previously selected

629   state in the U.S. / region in Italy> community?

- 630       ○ Not at all
- 631       ○ Somewhat
- 632       ○ Strongly
- 633       ○ Very strongly

634   Q37c How close do you feel to other members of the <name of previously selected state in the

635   U.S. / region in Italy> community?

- 636       ○ Not at all
- 637       ○ Somewhat
- 638       ○ Strongly
- 639       ○ Very strongly

640   Q38a How strongly do you feel attachment to the <Name of country>?

- 641       ○ Not at all
- 642       ○ Somewhat
- 643       ○ Strongly
- 644       ○ Very strongly

645   Q38b How strongly do you define yourself as a member of the <Name of country> community?

- 646       ○ Not at all
- 647       ○ Somewhat
- 648       ○ Strongly
- 649       ○ Very strongly

650   Q38c How close do you feel to other members of the <Name of country> community?

- 651       ○ Not at all
- 652       ○ Somewhat
- 653       ○ Strongly
- 654       ○ Very strongly

655 Q39a How strongly do you feel attachment to the **world as a whole**?  
656     ○ Not at all  
657     ○ Somewhat  
658     ○ Strongly  
659     ○ Very strongly

660 Q39b How strongly do you define yourself as a member of the **world** community?  
661     ○ Not at all  
662     ○ Somewhat  
663     ○ Strongly  
664     ○ Very strongly

665 Q39c How close do you feel to other members of the **world** community?  
666     ○ Not at all  
667     ○ Somewhat  
668     ○ Strongly  
669     ○ Very strongly

672 <I.9: General Trust>

673 Q40 How much do you trust people from your **local community** in general?  
674

|   |                               |                       |                       |                       |                             |
|---|-------------------------------|-----------------------|-----------------------|-----------------------|-----------------------------|
|   | 1 - I don't trust them at all | 2 (2)                 | 3                     | 4                     | 5 - I completely trust them |
| 1 | <input type="radio"/>         | <input type="radio"/> | <input type="radio"/> | <input type="radio"/> | <input type="radio"/>       |

675 Q41 How much do you trust people from <name of previously selected state in the U.S. /  
676 **region in Italy**> in general?

|   |                               |                       |                       |                       |                             |
|---|-------------------------------|-----------------------|-----------------------|-----------------------|-----------------------------|
|   | 1 - I don't trust them at all | 2 (2)                 | 3                     | 4                     | 5 - I completely trust them |
| 1 | <input type="radio"/>         | <input type="radio"/> | <input type="radio"/> | <input type="radio"/> | <input type="radio"/>       |

677 Q42 How much do you trust people the <Name of country> in general?

|   |                               |                       |                       |                       |                             |
|---|-------------------------------|-----------------------|-----------------------|-----------------------|-----------------------------|
|   | 1 - I don't trust them at all | 2 (2)                 | 3                     | 4                     | 5 - I completely trust them |
| 1 | <input type="radio"/>         | <input type="radio"/> | <input type="radio"/> | <input type="radio"/> | <input type="radio"/>       |

678 Q43 How much do you trust people from **other countries** in general?

679  
680  
681

|   |                               |                       |                       |                       |                             |
|---|-------------------------------|-----------------------|-----------------------|-----------------------|-----------------------------|
|   | 1 - I don't trust them at all | 2 (2)                 | 3                     | 4                     | 5 - I completely trust them |
| 1 | <input type="radio"/>         | <input type="radio"/> | <input type="radio"/> | <input type="radio"/> | <input type="radio"/>       |

<I.10: Immigration and Environment>

682 Q44 Please express your view on the following scale. The closer you are to statement (a), check  
683 a value on the scale close to 1. The closer you are to statement (b), check a value on the scale  
684 close to 5.

|                                                                                      |                       |                       |                       |                       |                       |                                                                                                     |
|--------------------------------------------------------------------------------------|-----------------------|-----------------------|-----------------------|-----------------------|-----------------------|-----------------------------------------------------------------------------------------------------|
|                                                                                      | 1                     | 2                     | 3                     | 4                     | 5                     |                                                                                                     |
| (a)<br>Immigrants today make our country stronger because of their work and talents. | <input type="radio"/> | (b)<br>Immigrants today are a burden on our country because they take our jobs and social benefits. |

685 Q45 How important is it to protect the environment to you personally  
686 ☐ Very important  
687 ☐ Quite important  
688 ☐ Somewhat important  
689 ☐ Not very important  
690 ☐ Not at all important

691 Q46 Suppose you were given another <\$5/4€> bonus by the researchers. Would you donate  
692 some or all of this to an environmental organization (if the researchers would match your  
693 donation so that the organization received twice as much)?  
694 ☐ Yes  
695 ☐ No

696 Q46a How much would you choose to donate to the environmental organization? Enter any  
697 amount up to <\$5.00 / €4.00> in <dollars/euros> and cents.

698 \_\_\_\_\_

699 Q47 How willing would you be to pay higher prices in order to protect the environment?  
700     ○ Very willing  
701     ○ Fairly willing  
702     ○ Neither willing nor unwilling  
703     ○ Fairly unwilling  
704     ○ Very unwilling  
705  
706  
707 Q48 As restrictions are lifted from this pandemic, which of these statements comes closer to your  
708 own point of view? The closer you are to statement (a), check a value on the scale close to  
709 1. The closer you are to statement (b), check a value on the scale close to 5.  
710

|                                                                                                                                                                 |                       |                       |                       |                       |                       |                                                                                                                                               |
|-----------------------------------------------------------------------------------------------------------------------------------------------------------------|-----------------------|-----------------------|-----------------------|-----------------------|-----------------------|-----------------------------------------------------------------------------------------------------------------------------------------------|
|                                                                                                                                                                 | 1                     | 2                     | 3                     | 4                     | 5                     |                                                                                                                                               |
| (a)<br>Protecting<br>the<br>environment<br>should be<br>given<br>priority,<br>even if it<br>causes<br>slower<br>economic<br>growth and<br>some loss of<br>jobs. | <input type="radio"/> | (b)<br>Economic<br>growth and<br>creating<br>jobs should<br>be given<br>priority,<br>even if the<br>environment<br>suffers to<br>some extent. |

711 Q48bis During the past month have you cut down your water consumption (for example not  
712 leaving water running when washing the dishes or taking a shower, etc.) for environmental  
713 reasons?  
714     ○ Always  
715     ○ Most of the time  
716     ○ About half the time  
717     ○ Sometimes  
718     ○ Never

719    <I.11: Globalization>

- 720    Q49 The world becoming more connected through greater economic trade and business ties is
- 721        ☐ Very good
- 722        ☐ Good
- 723        ☐ Neither good nor bad
- 724        ☐ Bad
- 725        ☐ Very bad

- 726    Q50 The world becoming more connected through faster communication and greater movements
- 727    of people is
- 728        ☐ Very good
- 729        ☐ Good
- 730        ☐ Neither good nor bad
- 731        ☐ Bad
- 732        ☐ Very bad

- 733    Q51 All things considered, how satisfied are you with your life as a whole these days?
- 734        ☐ Extremely satisfied
- 735        ☐ Somewhat satisfied
- 736        ☐ Neither satisfied nor dissatisfied
- 737        ☐ Somewhat dissatisfied
- 738        ☐ Extremely dissatisfied

739

740

741    <I.12: Economic Vulnerability>

- 742    Q52 What is your current working situation (paid work other than working on these surveys)?
- 743        ☐ Working at my workplace
- 744        ☐ Working from home
- 745        ☐ Not currently working

- 746    Q53 What is your usual employment situation?
- 747        ☐ Full-time employed
- 748        ☐ Part-time employed
- 749        ☐ Self-employed
- 750        ☐ Retired/Pensioned
- 751        ☐ Housewife/husband not otherwise employed
- 752        ☐ Student
- 753        ☐ Unemployed
- 754        ☐ On disability
- 755        ☐ Other
- 756
- 757
- 758

- 759

760

761

762
- Q54 Have you lost income or gained income because of COVID-19, or has it stayed stable?
- ☐

Lost
- ☐

Gained
- ☐

Stable

763

764

765

766

767

768

Q55 What percentage of your income have you lost?

☐

Less than 10%

☐

10% to less than 20%

☐

20% to less than 40%

☐

40% to 60%

☐

More than 60%

769

770

771

772

773

774

Q56 What percentage of your income have you gained?

☐

Less than 10%

☐

10% to less than 20%

☐

20 to less than 40%%

☐

40% to 60%

☐

More than 60%

775

776

777

778

779

780

Q57a **Prior** to the COVID-19 pandemic, when it came to the **financial situation of your household**, what were your expectations for the 12 months to come, would the next 12 months be better, worse, or the same?

☐

Worse

☐

The same

☐

Better

781

782

783

784

785

786

Q57b **Since** the COVID-19 pandemic, when it comes to the **financial situation of your household**, what are your expectations for the 12 months to come, will the next 12 months be better, worse, or the same?

☐

Worse

☐

The same

☐

Better

787

788

789

790

791

792

793

794

Q58a **Prior to** the COVID-19 pandemic, how likely did you believe it was that you would **still have a job** in 6 months (if you had a job then)?

☐

Very likely

☐

Likely

☐

Unlikely

☐

Very unlikely

☐

Not applicable - Did not have a job

795 Q58b Since the COVID-19 pandemic, how likely do you believe is it that you will still have a  
796 job in 6 months (if you have one now)?  
797     ○ Very likely  
798     ○ Likely  
799     ○ Unlikely  
800     ○ Very unlikely  
801     ○ Not applicable - Did not have a job

802  
803  
804 <I.13: Trust in Politicians>

805 Q59 Has your trust in politicians in <name of previously selected state in the U.S. / region in  
806 Italy> increased, decreased, or stayed stable for their handling of COVID-19?  
807     ○ Increased  
808     ○ Stayed the same  
809     ○ Decreased

810 Q60 Has your trust in politicians nationally increased, decreased, or stayed stable for their  
811 handling of COVID-19?  
812     ○ Increased  
813     ○ Stayed the same  
814     ○ Decreased

815 Q61 Has your trust in politicians globally increased, decreased, or stayed stable for their  
816 handling of COVID-19?  
817     ○ Increased  
818     ○ Stayed the same  
819     ○ Decreased

820 Q62 During this COVID-19 pandemic, have you received food, money, or other assistance from  
821 any of the following:

|                                 | Check all that apply     |
|---------------------------------|--------------------------|
| Friends or neighbors            | <input type="checkbox"/> |
| A charity (such as a food bank) | <input type="checkbox"/> |
| State government                | <input type="checkbox"/> |
| Federal government              | <input type="checkbox"/> |
| None                            | <input type="checkbox"/> |

823    <I.14: Political Views>

824    Q63 To what extent do you agree with the following statement? “People like me don’t have any  
825    say about what the government does”

- 826        ☐ Strongly disagree
- 827        ☐ Disagree
- 828        ☐ Neither agree nor disagree
- 829        ☐ Agree
- 830        ☐ Strongly agree

831    Q64 In political matters, people often talk of “Liberal” and “Conservative.” Generally speaking,  
832    how would you place your views on this scale?

- 833        ☐ Very Liberal
- 834        ☐ Moderately liberal
- 835        ☐ Neither liberal nor conservative
- 836        ☐ Moderately conservative
- 837        ☐ Very conservative

838    Q65 Generally speaking, do you think of yourself as a Democrat, Independent, Republican, or  
839    something else?

- 840        ☐ Democrat
- 841        ☐ Independent
- 842        ☐ Republican
- 843        ☐ Something else
- 844        ☐ No party

845    Q65bis Generally speaking, how would you define your political orientation?

- 846        ☐ Lega
- 847        ☐ PD
- 848        ☐ Movimento 5 Stelle
- 849        ☐ Fratelli d'Italia
- 850        ☐ Forza Italia
- 851        ☐ Something else (specify at next question)
- 852        ☐ No party

853    (If Something else is selected:) Please indicate your political orientation:

854    \_\_\_\_\_

855    <I.15: Demographics>

856    <Question only asked in the U.S.:> Q66 How would you define your ethnicity? (Choose all that

857    apply)

858        ☐ White

859        ☐ African American

860        ☐ White Hispanic

861        ☐ Other Hispanic

862        ☐ Asian or Asian American

863        ☐ Native American

864        ☐ Middle Eastern

865        ☐ Other (Please specify at next question)

866    <Question only asked in the U.S.:> Q66a Ethnicity if you chose other:

867    \_\_\_\_\_

868    -----

869    Q66bis1 In which country was your **mother** born?

870    Q66bis2 In which country was your **father** born?

871    -----

872    Q67 Look at the following categories. What is the category that best represents your current or

873    last occupation? (Choose only one answer)

874        ☐ Managers

875        ☐ Professionals

876        ☐ Technicians and Associate Professionals

877        ☐ Clerical Support Workers

878        ☐ Service and Sale Workers

879        ☐ Skilled Agricultural, Forestry and Fishery Workers

880        ☐ Craft and Related Trades Workers

881        ☐ Plant and Machines Operators, and Assemblers

882        ☐ Unskilled Labor

883        ☐ Armed Forces Occupations

884 Q68 Here is a scale of incomes. We would like to know in what group your household is,  
885 counting all wages, salaries, pensions and other incomes that come in. Just check the group your  
886 household fell into in 2019, in terms of gross income before deductions.

- 887 ☐ \$0 - \$9,999
- 888 ☐ \$10,000 - \$14,999
- 889 ☐ \$15,000 - \$24,999
- 890 ☐ \$25,000 - \$34,999
- 891 ☐ \$35,000 - \$49,999
- 892 ☐ \$50,000 - \$74,999
- 893 ☐ \$75,000 - \$99,999
- 894 ☐ \$100,000 - \$149,999
- 895 ☐ \$150,000 - \$199,999
- 896 ☐ Over \$200,000

897 Q68a Here is a scale of incomes. We would like to know in what group your household is,  
898 counting all wages, salaries, pensions and other incomes that come in. Just check the group your  
899 household fell into in 2019, in terms of gross income before deductions.

- 900 ☐ €0 - €5,999
- 901 ☐ €6.000 - €11,999
- 902 ☐ €12.000 - €23,999
- 903 ☐ €24.000 - €35,999
- 904 ☐ €36.000 - €47,999
- 905 ☐ €48.000 - €59,999
- 906 ☐ €60.000 - €71,999
- 907 ☐ €72.000 - €83,999
- 908 ☐ €84.000 - €99,999
- 909 ☐ Over €100.000

910 <**I.15: Choice of Charity**><Questions Q68b-j were only asked in Italy.>

911 You have previously made a choice regarding the destination of your bonus to a charity active  
912 in your **region** | in **Italy** | in the **world**.

913 Q68b In your opinion, which type of charity is the most efficient, i.e. the one most capable of  
914 eliminating waste in the management of donations?

915 ☐ Regional aid organization  
916 ☐ National aid organization  
917 ☐ International aid organization  
918 ☐ There are no differences

919 Q68c In your opinion, what type of charity is best able to achieve the goal of helping people  
920 affected by COVID-19?

921 ☐ Regional aid organization  
922 ☐ National aid organization  
923 ☐ International aid organization  
924 ☐ There are no differences

925 Q68d In your opinion, what kind of charity is best able to help you and your family if you  
926 need it?

927 ☐ Regional aid organization  
928 ☐ National aid organization  
929 ☐ International aid organization  
930 ☐ There are no differences

931 Q68e In your opinion, which people are most in need of help because of the COVID-19  
932 epidemic?

933 ☐ People in the <name of previously selected region>  
934 ☐ People in Italy  
935 ☐ People from all over the world  
936 ☐ There are no differences

937 Q68f Think about your choice of the charity to which you want to contribute, you had chosen  
938 to **donate to the <name of previously selected region>**. Imagine making this decision two  
939 months ago, during the peak of the Covid-19 outbreak. Would you have made the same  
940 choice again?

941 ☐ Yes  
942 ☐ No

943 Q68g What would have been your choice then

944 ☐ <name of previously selected region> aid organization  
945 ☐ National aid organization  
946 ☐ International aid organization  
947 ☐ I would not have donated

948 Q68h Think back to your choice of the charity to which to allocate your contribution, you had  
949 chosen **not to donate**. Imagine making this decision two months ago, during the peak of the  
950 Covid-19 epidemic. Would you have made the same choice again?  
951     ☐ Yes  
952     ☐ No

953 Q68i What would have been your choice then  
954     ☐ <name of previously selected region> aid organization  
955     ☐ National aid organization  
956     ☐ International aid organization

957 Q68j How many euros would you have liked to contribute?

958 Fill in any amount up to €4.00 in euros and cents.

959 \_\_\_\_\_

960

961

962 <I.16: Charitable Motivation>

963 Q69 Could you briefly explain what motivated your COVID-19 aid organization donation  
964 decision earlier in the survey?

965 \_\_\_\_\_

966

967 Q70 Do you think that the researchers preferred you to donate to one of the specific charities?

968 

☐ Yes

969 

☐ No

970 Q70a Which one?

971 

☐ <name of previously selected state in the U.S. / region in Italy> Charity

972 

☐ National Charity

973 

☐ World Charity

974 Q70b Which charity do you think is the most chosen by other participants in this study as the

975 recipient of donations?

976 

☐ Regional Charity

977 

☐ National Charity

978 

☐ World Charity

979

980 <I.17: Survey Modality>

981 Q80 Did you take the survey on a phone?

982 

☐ Yes

983 

☐ No

984

985 <I.18: Social Identity - Region Italy>

986 Q80bis Which region do you feel you belong to the most?

987

988 -----

989 Qend Please contact us at studycontact@moore.sc.edu if you want to receive certification of

990 our donations to organizations. We will be happy to show such certification when our survey

991 is completed.
